# Supplementary material for: Evaluation of Autoantibody Binding to Cardiac Tissue in Multisystem Inflammatory Syndrome in Children and COVID-19 Vaccination–Induced Myocarditis
Source: PubMed Central journal article supplement (PMC10196878; doi:10.1001/jamanetworkopen.2023.14291), 2023-05-18
Supplement: jamanetwopen-e2314291-s001.pdf [file jamanetwopen-e2314291-s001.pdf]

## Supplemental Online Content

Patel H, Sintou A, Chowdhury RA, et al; DIAMONDS consortium. Evaluation of autoantibody binding to cardiac tissue in multisystem inflammatory syndrome in children and COVID-19 vaccination–induced myocarditis. *JAMA Netw Open*. 2023;6(5):e2314291. doi:10.1001/jamanetworkopen.2023.14291

**eTable 1.** Cardiac Donors and Details of Cardiac Tissue Collection and Storage

**eTable 2.** Clinical and Demographic Details of Adult Myocarditis/Inflammatory Cardiomyopathy Cases

**eFigure 1.** IgG Immunohistochemistry Images of Adult Myocarditis (Positive Control) Repeated on 3 Separate Experiments

**eFigure 2.** IgM Immunohistochemistry Images—Donor A

**eFigure 3.** IgM Immunohistochemistry Images—Donor B

**eFigure 4.** IgA Immunohistochemistry Images—Donor A

**eFigure 5.** IgA Immunohistochemistry Images—Donor B

**eFigure 6.** IgG Immunohistochemistry Images for Adult Myocarditis/Inflammatory Cardiomyopathy Patients—Donor A

This supplemental material has been provided by the authors to give readers additional information about their work.

**eTable 1.** Cardiac donors and details of cardiac tissue collection and storage

|                                                     | <b>Donor A</b>                                                                                                                                                                                                                                                                                                      | <b>Donor B</b>                                                                             |
|-----------------------------------------------------|---------------------------------------------------------------------------------------------------------------------------------------------------------------------------------------------------------------------------------------------------------------------------------------------------------------------|--------------------------------------------------------------------------------------------|
| <b>Age (years)</b>                                  | 48                                                                                                                                                                                                                                                                                                                  | 17                                                                                         |
| <b>Sex</b>                                          | Male                                                                                                                                                                                                                                                                                                                | Female                                                                                     |
| <b>Past medical history</b>                         | Nil recorded                                                                                                                                                                                                                                                                                                        | No history of: HTN/cardi thoracic disease/liver disease/diabetes/smoking/alcohol drinking. |
| <b>Cause of death</b>                               | Hemorrhage                                                                                                                                                                                                                                                                                                          | Status Epilepticus                                                                         |
| <b>Reason for unsuitability as transplant organ</b> | Poor function                                                                                                                                                                                                                                                                                                       | Deterioration on organ care system                                                         |
| <b>Sample collection and storage</b>                | The hearts were flash-frozen in liquid nitrogen, then stored at $-80\text{ }^{\circ}\text{C}$ for cryosectioning. Heart tissue was cut into $7\mu\text{m}$ thick sections using a cryostat (CM1850, Leica, Germany) and air-dried for 15 minutes before storing long-term at $-80\text{ }^{\circ}\text{C}$ freezer. |                                                                                            |

**eTable 2.** Clinical and demographic details of seven adult myocarditis/inflammatory cardiomyopathy cases

|                                                                      | Patient - 1                          | Patient - 2                 | Patient - 3                                      | Patient - 4                                  | Patient - 5                 | Patient - 6                 | Patient - 7                                     |
|----------------------------------------------------------------------|--------------------------------------|-----------------------------|--------------------------------------------------|----------------------------------------------|-----------------------------|-----------------------------|-------------------------------------------------|
| <b>Age (years)</b>                                                   | 61                                   | 48                          | 68                                               | 76                                           | 48                          | 61                          | 27                                              |
| <b>Sex</b>                                                           | Female                               | Male                        | Female                                           | Male                                         | Male                        | Male                        | Male                                            |
| <b>Self-reported ethnicity</b>                                       | Caucasian                            | Caucasian                   | Caucasian                                        | Caucasian                                    | Caucasian                   | Caucasian                   | Caucasian                                       |
| <b>Maximum CRP (mg/L)<br/>[normal range &lt; 3 mg/L]</b>             | 136                                  | 4                           | 14.3                                             | 270.5                                        | 3                           | 31.4                        | 56.6                                            |
| <b>Maximum cardiac Troponin (ng/L)<br/>[normal range:&lt;14ng/L]</b> | 353                                  | 48                          | 610                                              | 34                                           | 20                          | 318                         | 2179                                            |
| <b>Maximum NT-proBNP (ng/L)<br/>[normal range &lt; 50 ng/L]</b>      | 38744                                | 256                         | 824                                              | 9004                                         | 8131                        | 208886                      | 266                                             |
| <b>Ejection fraction on echocardiogram<br/>[normal range 50-70%]</b> | 19%                                  | 40%                         | 59%                                              | 20%                                          | 15%                         | 33%                         | 56%                                             |
| <b>Significant Cardiac Magnetic Resonance Imaging findings</b>       | Not done                             | late gadolinium enhancement | No significant abnormality                       | late gadolinium enhancement, perimyocarditis | late gadolinium enhancement | No significant abnormality  | late gadolinium enhancement, edema, myocarditis |
| <b>Cardiac biopsy diagnosis</b>                                      | inflammatory cardiomyopathy          | inflammatory cardiomyopathy | acute myocarditis                                | inflammatory cardiomyopathy                  | inflammatory cardiomyopathy | inflammatory cardiomyopathy | inflammatory cardiomyopathy                     |
| <b>Final diagnosis</b>                                               | terminal inflammatory cardiomyopathy | inflammatory cardiomyopathy | Immune Checkpoint Inhibitors-induced myocarditis | inflammatory cardiomyopathy                  | inflammatory cardiomyopathy | inflammatory cardiomyopathy | recurrent myocarditis                           |

**eFigure 1.** IgG Immunohistochemistry images of adult myocarditis (positive control) repeated on 3 separate experiments

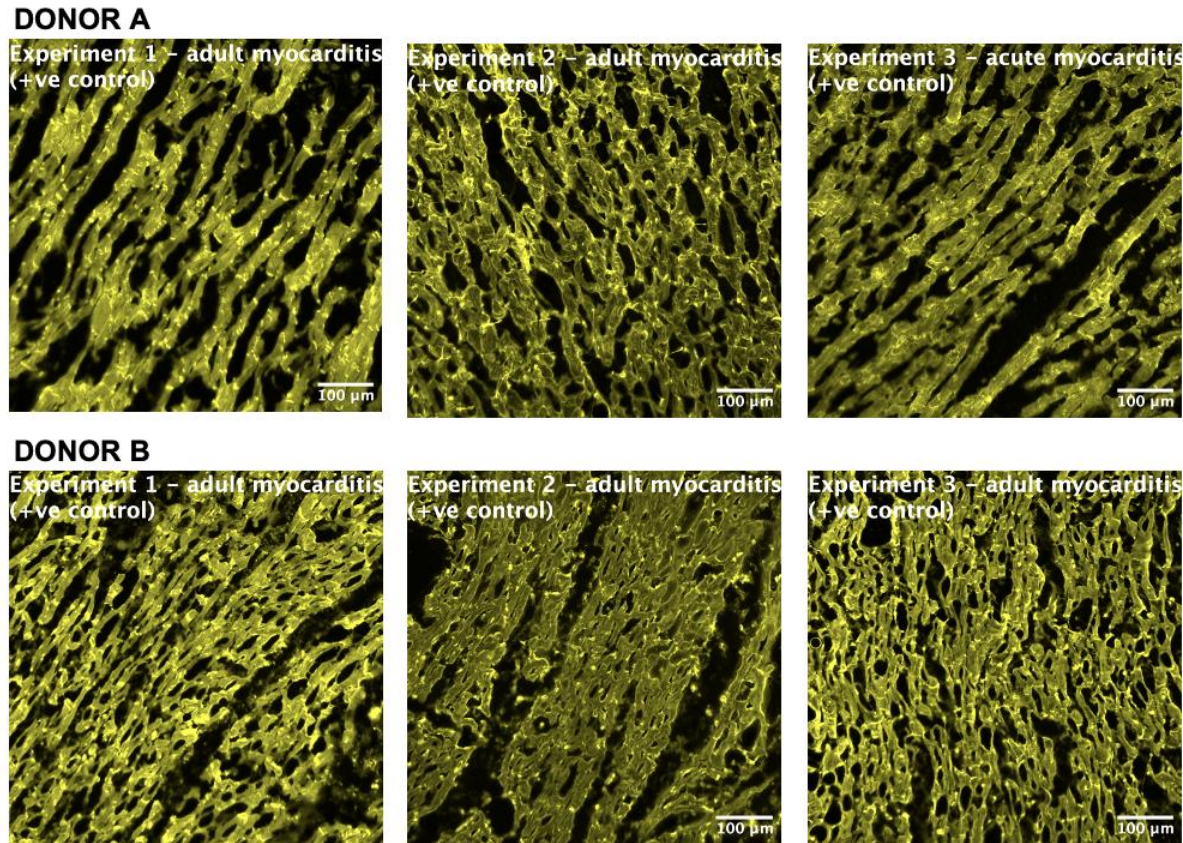

**Supplementary eFigure 1:** Immunohistochemistry images of cardiac tissue (Donor A and Donor B) treated with serum (1:50) from an adult with non-SARS-CoV-2 myocarditis and stained with Fluorescein isothiocyanate (FIT-C) conjugated anti-human IgG, repeated on three separate experiments. Images were taken on widefield microscope at using a 20x 0.8na objective.

**eFigure 2.** IgM immunohistochemistry images – Donor A

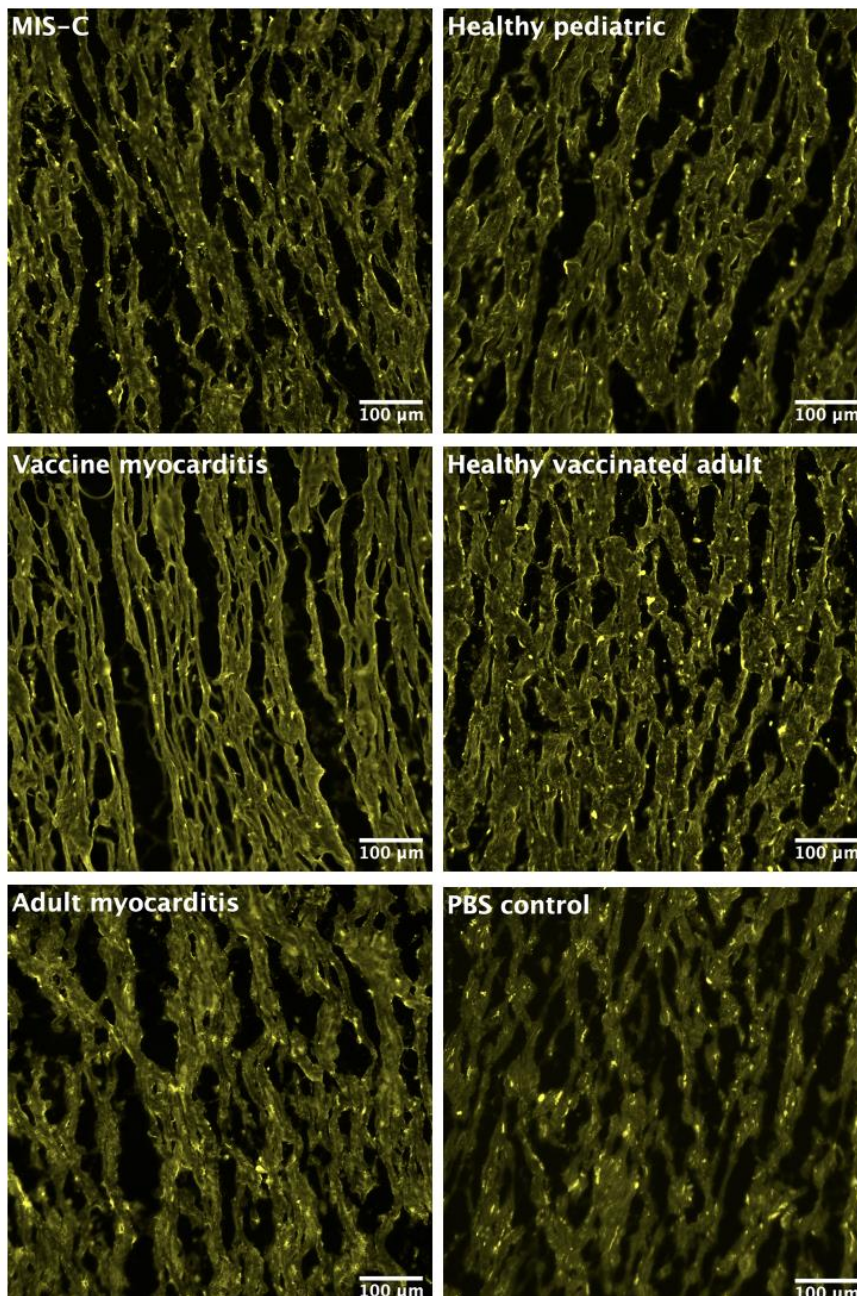

**Supplementary eFigure 2:** Immunohistochemistry images of cardiac tissue (Donor A) treated with serum (1:50) from patients and controls and stained with Fluorescein isothiocyanate (FIT-C) conjugated anti-human IgM. Images were taken on widefield microscope at using a 20x 0.8na objective. An example image from each of the following groups has been shown: Phosphate buffered saline (PBS) – negative control, healthy pre-pandemic paediatric control, healthy adults  $\geq 14$  days following COVID-19 vaccination, COVID-19 vaccine associated myocarditis and Multisystem Inflammatory Syndrome in Children (MIS-C).

**eFigure 3.** IgM immunohistochemistry images – Donor B

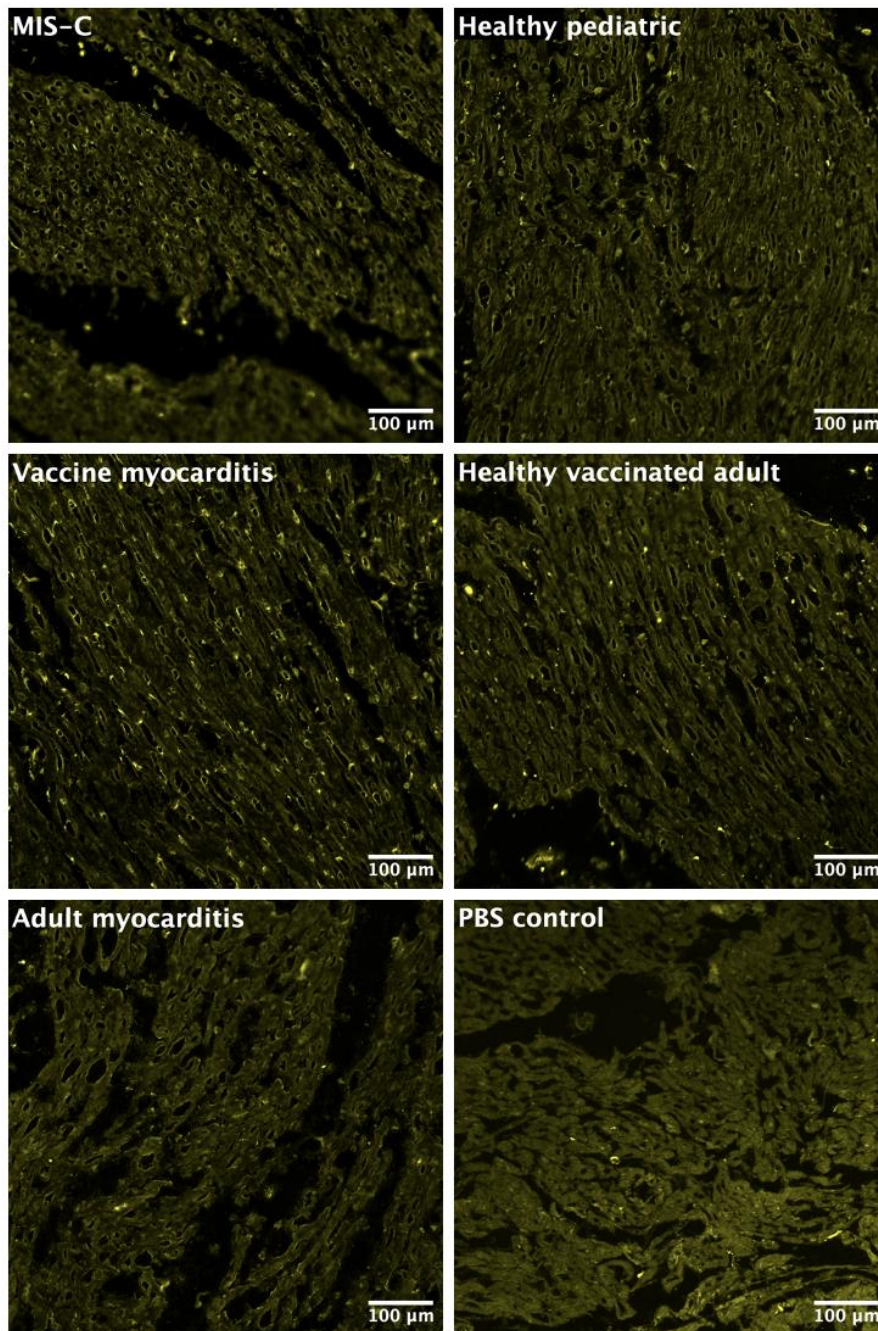

**Supplementary eFigure 3:** Immunohistochemistry images of cardiac tissue (Donor B) treated with serum (1:50) from patients and controls and stained with Fluorescein isothiocyanate (FIT-C) conjugated anti-human IgM. Images were taken on widefield microscope at using a 20x 0.8na objective. An example image from each of the following groups has been shown: Phosphate buffered saline (PBS) – negative control, healthy pre-pandemic paediatric control, healthy adults  $\geq 14$  days following COVID-19 vaccination, COVID-19 vaccine associated myocarditis and Multisystem Inflammatory Syndrome in Children (MIS-C).

**eFigure 4.** IgA immunohistochemistry images – Donor A

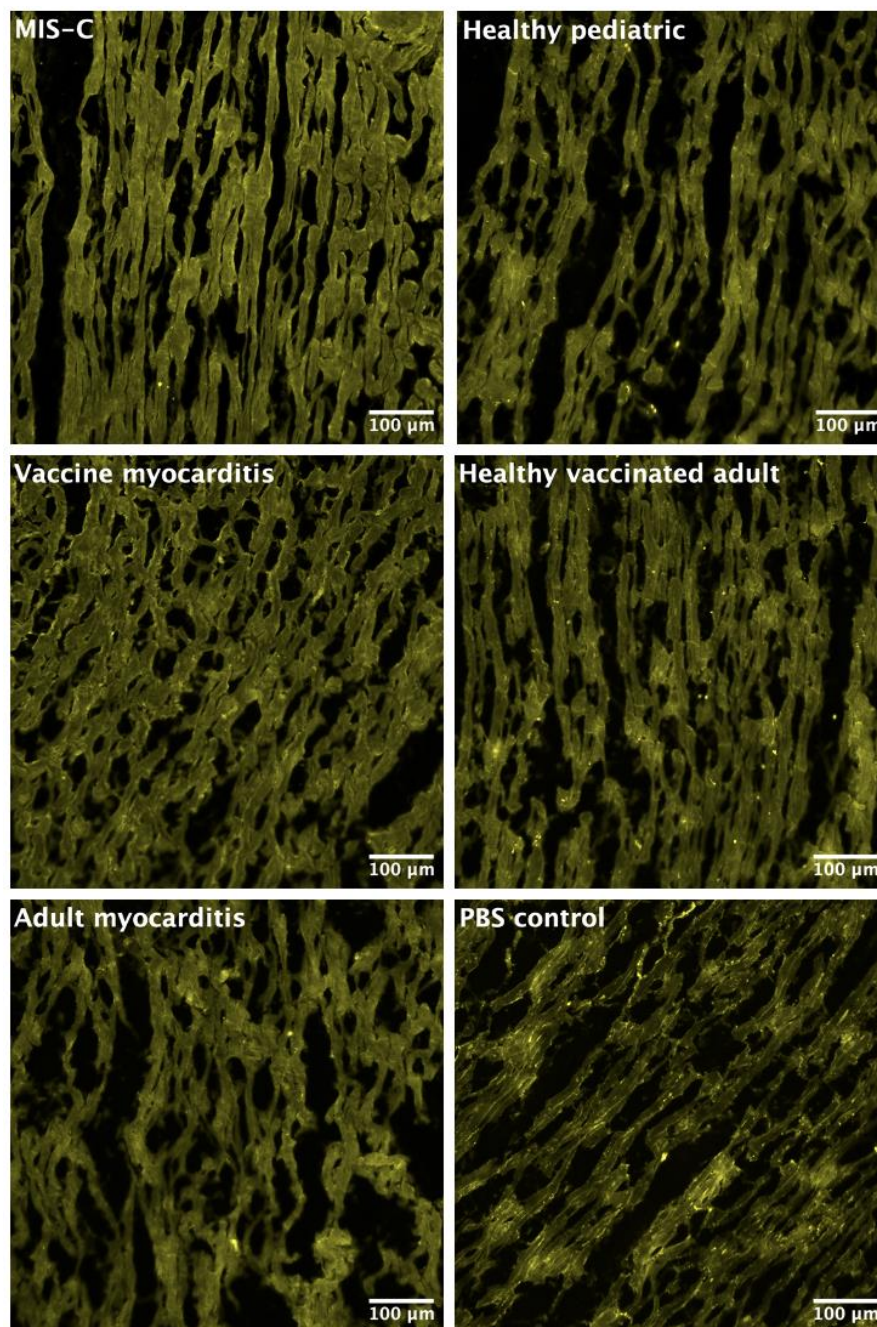

**Supplementary eFigure 4:** Immunohistochemistry images of cardiac tissue (Donor A) treated with serum (1:50) from patients and controls and stained with Fluorescein isothiocyanate (FIT-C) conjugated anti-human IgA. Images were taken on widefield microscope at using a 20x 0.8na objective. An example image from each of the following groups has been shown: Phosphate buffered saline (PBS) – negative control, healthy pre-pandemic paediatric control, healthy adults  $\geq 14$  days following COVID-19 vaccination, COVID-19 vaccine associated myocarditis and Multisystem Inflammatory Syndrome in Children (MIS-C).

**eFigure 5.** IgA immunohistochemistry images – Donor B

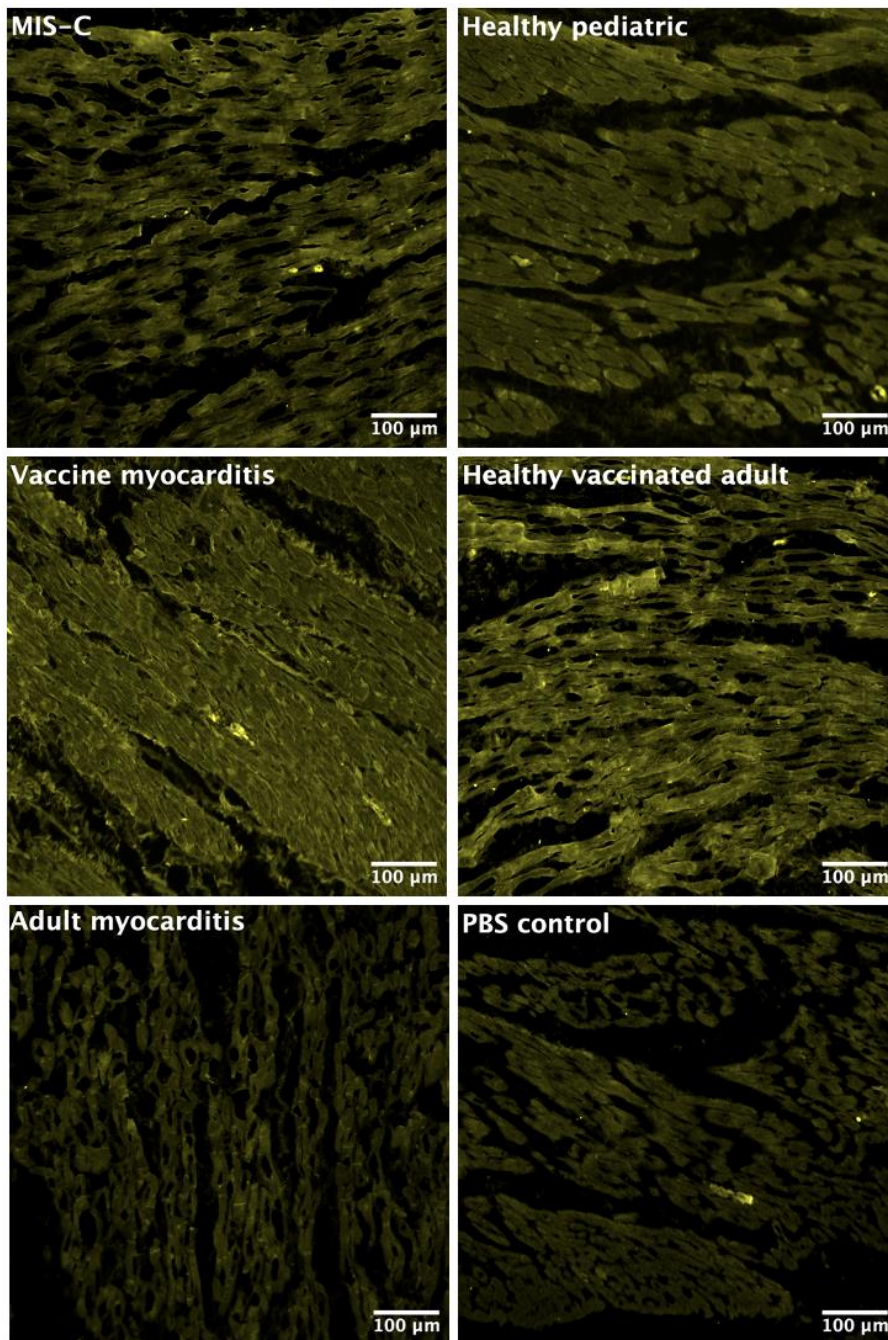

**Supplementary eFigure 5:** Immunohistochemistry images of cardiac tissue (Donor B) treated with serum (1:50) from patients and controls and stained with Fluorescein isothiocyanate (FIT-C) conjugated anti-human IgA. Images were taken on widefield microscope at using a 20x 0.8na objective. An example image from each of the following groups has been shown: Phosphate buffered saline (PBS) – negative control, healthy pre-pandemic paediatric control, healthy adults  $\geq 14$  days following COVID-19 vaccination, COVID-19 vaccine associated myocarditis and Multisystem Inflammatory Syndrome in Children (MIS-C).



**eFigure 6.** IgG immunohistochemistry images for adult myocarditis/inflammatory cardiomyopathy patients – Donor A

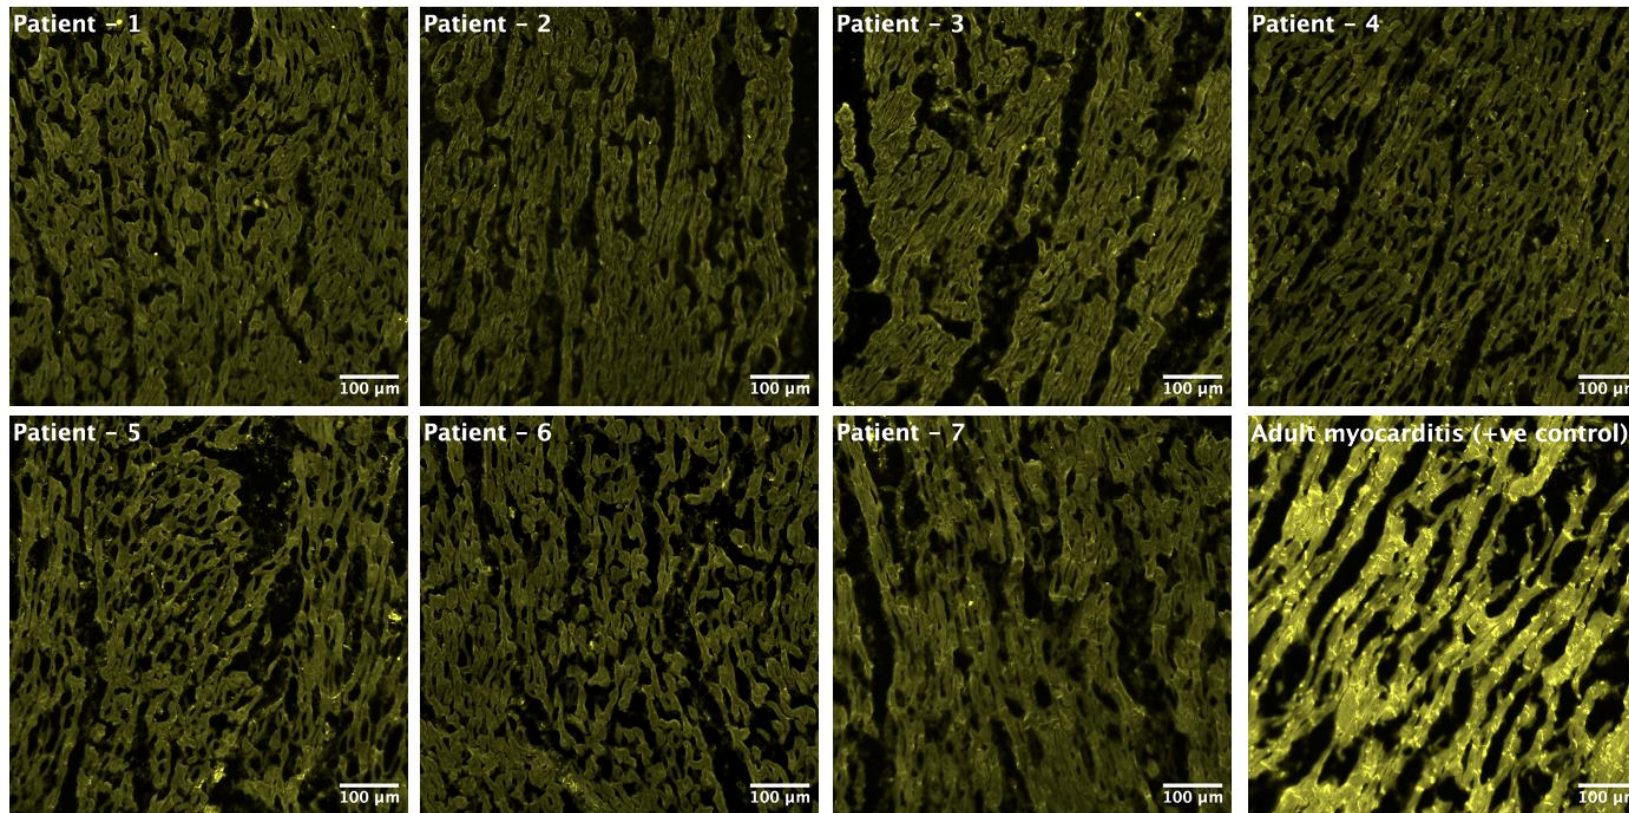

**Supplementary eFigure 6:** Immunohistochemistry images of cardiac tissue (Donor B) treated with serum (1:50) from adults with myocarditis/inflammatory cardiomyopathy stained with Fluorescein isothiocyanate (FIT-C) conjugated anti-human IgA. Images were taken on widefield microscope at using a 20x 0.8na objective. An example image from each patient has been shown.
