# Supplementary material for: Evaluation of Autoantibody Binding to Cardiac Tissue in Multisystem Inflammatory Syndrome in Children and COVID-19 Vaccination–Induced Myocarditis
Source: PubMed Central journal article supplement (PMC10196878; doi:10.1001/jamanetworkopen.2023.14291), 2023-05-18
Supplement: jamanetwopen-e2314291-s002.pdf [file jamanetwopen-e2314291-s002.pdf]

\*First name, last name, and suffix (if applicable) are required and will appear in PubMed.

| <b>*Group Name(s): DIAMONDS consortium</b> |                      |                              |                  |                                       |                                          |                                                         |                                                                                            |
|--------------------------------------------|----------------------|------------------------------|------------------|---------------------------------------|------------------------------------------|---------------------------------------------------------|--------------------------------------------------------------------------------------------|
| <b>*First Name and Middle Initial(s)</b>   | <b>*Last Name</b>    | <b>*Suffix (eg, Jr, III)</b> | Academic Degrees | Institution                           | Location (city, state/province, country) | Role or Contribution, eg, chair, principal investigator | Group (if more than 1 Group listed in the byline) and/or Subgroup (eg, Steering Committee) |
| Aubrey                                     | Cunnington           |                              |                  | Imperial College London               |                                          | Consortium member                                       |                                                                                            |
| Jethro                                     | Herberg              |                              |                  | Imperial College London               |                                          | Consortium member                                       |                                                                                            |
| Myrsini                                    | Kaforou              |                              |                  | Imperial College London               |                                          | Consortium member                                       |                                                                                            |
| Victoria J.                                | Wright               |                              |                  | Imperial College London               |                                          | Consortium member                                       |                                                                                            |
| Evangelos                                  | Bellos               |                              |                  | Imperial College London               |                                          | Consortium member                                       |                                                                                            |
| Claire                                     | Broderick            |                              |                  | Imperial College London               |                                          | Consortium member                                       |                                                                                            |
| Samuel                                     | Channon-Wells        |                              |                  | Imperial College London               |                                          | Consortium member                                       |                                                                                            |
| Samantha                                   | Cooray               |                              |                  | Imperial College London               |                                          | Consortium member                                       |                                                                                            |
| Tisham                                     | De                   |                              |                  | Imperial College London               |                                          | Consortium member                                       |                                                                                            |
| Giselle                                    | D'Souza              |                              |                  | Imperial College London               |                                          | Consortium member                                       |                                                                                            |
| Leire                                      | Estramiana Elorrieta |                              |                  | Imperial College London               |                                          | Consortium member                                       |                                                                                            |
| Diego                                      | Estrada-Rivadeneira  |                              |                  | Imperial College London               |                                          | Consortium member                                       |                                                                                            |
| Rachel                                     | Galassini            |                              |                  | Imperial College London               |                                          | Consortium member                                       |                                                                                            |
| Dominic                                    | Habgood-Coote        |                              |                  | Imperial College London               |                                          | Consortium member                                       |                                                                                            |
| Shea                                       | Hamilton             |                              |                  | Imperial College London               |                                          | Consortium member                                       |                                                                                            |
| Heather                                    | Jackson              |                              |                  | Imperial College London               |                                          | Consortium member                                       |                                                                                            |
| James                                      | Kavanagh             |                              |                  | Imperial College London               |                                          | Consortium member                                       |                                                                                            |
| Ilana                                      | Keren                |                              |                  | Imperial College London               |                                          | Consortium member                                       |                                                                                            |
| Mahdi                                      | Moradi Marjaneh      |                              |                  | Imperial College London               |                                          | Consortium member                                       |                                                                                            |
| Stephanie                                  | Menikou              |                              |                  | Imperial College London               |                                          | Consortium member                                       |                                                                                            |
| Samuel                                     | Nichols              |                              |                  | Imperial College London               |                                          | Consortium member                                       |                                                                                            |
| Ruud                                       | Nijman               |                              |                  | Imperial College London               |                                          | Consortium member                                       |                                                                                            |
| Ivana                                      | Pennisi              |                              |                  | Imperial College London               |                                          | Consortium member                                       |                                                                                            |
| Oliver                                     | Powell               |                              |                  | Imperial College London               |                                          | Consortium member                                       |                                                                                            |
| Ruth                                       | Reid                 |                              |                  | Imperial College London               |                                          | Consortium member                                       |                                                                                            |
| Priyen                                     | Shah                 |                              |                  | Imperial College London               |                                          | Consortium member                                       |                                                                                            |
| Ortensia                                   | Vito                 |                              |                  | Imperial College London               |                                          | Consortium member                                       |                                                                                            |
| Elizabeth                                  | Whittaker            |                              |                  | Imperial College London               |                                          | Consortium member                                       |                                                                                            |
| Clare                                      | Wilson               |                              |                  | Imperial College London               |                                          | Consortium member                                       |                                                                                            |
| Rebecca                                    | Womersley            |                              |                  | Imperial College London               |                                          | Consortium member                                       |                                                                                            |
| Amina                                      | Abdulla              |                              |                  | Imperial College Healthcare NHS Trust |                                          | Consortium member                                       |                                                                                            |
| Sarah                                      | Darnell              |                              |                  | Imperial College Healthcare NHS Trust |                                          | Consortium member                                       |                                                                                            |

## Supplemental Online Content: Nonauthor Collaborators

\*First name, last name, and suffix (if applicable) are required and will appear in PubMed.

| *First Name and Middle Initial(s) | *Last Name | *Suffix (eg, Jr, III) | Academic Degrees | Institution                                                                                          | Location (city, state/province, country) | Role or Contribution, eg, chair, principal investigator | Group (if more than 1 Group listed in the byline) and/or Subgroup (eg, Steering Committee) |
|-----------------------------------|------------|-----------------------|------------------|------------------------------------------------------------------------------------------------------|------------------------------------------|---------------------------------------------------------|--------------------------------------------------------------------------------------------|
| Sobia                             | Mustafa    |                       |                  | Imperial College Healthcare NHS Trust                                                                |                                          | Consortium member                                       |                                                                                            |
| Pantelis                          | Georgiou   |                       |                  | Imperial College London                                                                              |                                          | Consortium member                                       |                                                                                            |
| Jesus-Rodriguez                   | Manzano    |                       |                  | Imperial College London                                                                              |                                          | Consortium member                                       |                                                                                            |
| Nicolas                           | Moser      |                       |                  | Imperial College London                                                                              |                                          | Consortium member                                       |                                                                                            |
| Michael                           | Carter     |                       |                  | Evelina London Children's Hospital, Guy's and St Thomas' NHS Foundation Trust; King's College London |                                          | Consortium member                                       |                                                                                            |
| Shane                             | Tibby      |                       |                  | Evelina London Children's Hospital, Guy's and St Thomas' NHS Foundation Trust; King's College London |                                          | Consortium member                                       |                                                                                            |
| Jonathan                          | Cohen      |                       |                  | Evelina London Children's Hospital, Guy's and St Thomas' NHS Foundation Trust; King's College London |                                          | Consortium member                                       |                                                                                            |
| Francesca                         | Davis      |                       |                  | Evelina London Children's Hospital, Guy's and St Thomas' NHS Foundation Trust; King's College London |                                          | Consortium member                                       |                                                                                            |
| Julia                             | Kenny      |                       |                  | Evelina London Children's Hospital, Guy's and St Thomas' NHS Foundation Trust; King's College London |                                          | Consortium member                                       |                                                                                            |
| Paul                              | Wellman    |                       |                  | Evelina London Children's Hospital, Guy's and St Thomas' NHS Foundation Trust; King's College London |                                          | Consortium member                                       |                                                                                            |
| Marie                             | White      |                       |                  | Evelina London Children's Hospital, Guy's and St Thomas' NHS Foundation Trust; King's College London |                                          | Consortium member                                       |                                                                                            |

## Supplemental Online Content: Nonauthor Collaborators

\*First name, last name, and suffix (if applicable) are required and will appear in PubMed.

| *First Name and Middle Initial(s) | *Last Name   | *Suffix (eg, Jr, III) | Academic Degrees | Institution                                                                                          | Location (city, state/province, country) | Role or Contribution, eg, chair, principal investigator | Group (if more than 1 Group listed in the byline) and/or Subgroup (eg, Steering Committee) |
|-----------------------------------|--------------|-----------------------|------------------|------------------------------------------------------------------------------------------------------|------------------------------------------|---------------------------------------------------------|--------------------------------------------------------------------------------------------|
| Matthew                           | Fish         |                       |                  | Evelina London Children's Hospital, Guy's and St Thomas' NHS Foundation Trust; King's College London |                                          | Consortium member                                       |                                                                                            |
| Aislinn                           | Jennings     |                       |                  | Evelina London Children's Hospital, Guy's and St Thomas' NHS Foundation Trust; King's College London |                                          | Consortium member                                       |                                                                                            |
| Manu                              | Shankar-Hari |                       |                  | Evelina London Children's Hospital, Guy's and St Thomas' NHS Foundation Trust; King's College London |                                          | Consortium member                                       |                                                                                            |
| Katy                              | Fidler       |                       |                  | University Hospitals Sussex                                                                          |                                          | Consortium member                                       |                                                                                            |
| Dan                               | Agranoff     |                       |                  | University Hospitals Sussex                                                                          |                                          | Consortium member                                       |                                                                                            |
| Vivien                            | Richmond     |                       |                  | University Hospitals Sussex                                                                          |                                          | Consortium member                                       |                                                                                            |
| Mathew                            | Seal         |                       |                  | University Hospitals Sussex                                                                          |                                          | Consortium member                                       |                                                                                            |
| Saul                              | Faust        |                       |                  | University Hospital Southampton NHS                                                                  |                                          | Consortium member                                       |                                                                                            |
| Dan                               | Owen         |                       |                  | University Hospital Southampton NHS Foundation Trust                                                 |                                          | Consortium member                                       |                                                                                            |
| Ruth                              | Ensom        |                       |                  | University Hospital Southampton NHS Foundation Trust                                                 |                                          | Consortium member                                       |                                                                                            |
| Sarah                             | McKay        |                       |                  | University Hospital Southampton NHS Foundation Trust                                                 |                                          | Consortium member                                       |                                                                                            |
| Mariya                            | Shaji        |                       |                  | University Hospital Southampton NHS Foundation Trust                                                 |                                          | Consortium member                                       |                                                                                            |
| Rachel                            | Schranz      |                       |                  | University Hospital Southampton NHS Foundation Trust                                                 |                                          | Consortium member                                       |                                                                                            |
| Prita                             | Rughnani     |                       |                  | Barts Health NHS Trust                                                                               |                                          | Consortium member                                       |                                                                                            |
| Amutha                            | Anpananthar  |                       |                  | Barts Health NHS Trust                                                                               |                                          | Consortium member                                       |                                                                                            |
| Susan                             | Liebeschuetz |                       |                  | Barts Health NHS Trust                                                                               |                                          | Consortium member                                       |                                                                                            |
| Anna                              | Riddell      |                       |                  | Barts Health NHS Trust                                                                               |                                          | Consortium member                                       |                                                                                            |
| Divya                             | Divakaran    |                       |                  | Barts Health NHS Trust                                                                               |                                          | Consortium member                                       |                                                                                            |
| Louise                            | Han          |                       |                  | Barts Health NHS Trust                                                                               |                                          | Consortium member                                       |                                                                                            |
| Nosheen                           | Khalid       |                       |                  | Barts Health NHS Trust                                                                               |                                          | Consortium member                                       |                                                                                            |
| Ivone Lancoma                     | Malcolm      |                       |                  | Barts Health NHS Trust                                                                               |                                          | Consortium member                                       |                                                                                            |

## Supplemental Online Content: Nonauthor Collaborators

\*First name, last name, and suffix (if applicable) are required and will appear in PubMed.

| *First Name and Middle Initial(s) | *Last Name | *Suffix (eg, Jr, III) | Academic Degrees | Institution                                                    | Location (city, state/province, country) | Role or Contribution, eg, chair, principal investigator | Group (if more than 1 Group listed in the byline) and/or Subgroup (eg, Steering Committee) |
|-----------------------------------|------------|-----------------------|------------------|----------------------------------------------------------------|------------------------------------------|---------------------------------------------------------|--------------------------------------------------------------------------------------------|
| Jessica                           | Schofield  |                       |                  | Barts Health NHS Trust                                         |                                          | Consortium member                                       |                                                                                            |
| Teresa                            | Simagan    |                       |                  | Barts Health NHS Trust                                         |                                          | Consortium member                                       |                                                                                            |
| Mark                              | Peters     |                       |                  | Great Ormond Street Hospital for Children NHS Foundation Trust |                                          | Consortium member                                       |                                                                                            |
| Alasdair                          | Bamford    |                       |                  | Great Ormond Street Hospital for Children NHS Foundation Trust |                                          | Consortium member                                       |                                                                                            |
| Lauran                            | O'Neill    |                       |                  | Great Ormond Street Hospital for Children NHS Foundation Trust |                                          | Consortium member                                       |                                                                                            |
| Nazima                            | Pathan     |                       |                  | Cambridge University Hospitals NHS Foundation Trust            |                                          | Consortium member                                       |                                                                                            |
| Esther                            | Daubney    |                       |                  | Cambridge University Hospitals NHS Foundation Trust            |                                          | Consortium member                                       |                                                                                            |
| Deborah                           | White      |                       |                  | Cambridge University Hospitals NHS Foundation Trust            |                                          | Consortium member                                       |                                                                                            |
| Melissa                           | Heightman  |                       |                  | University College London Hospitals NHS Foundation Trust       |                                          | Consortium member                                       |                                                                                            |
| Sarah                             | Eisen      |                       |                  | University College London Hospitals NHS Foundation Trust       |                                          | Consortium member                                       |                                                                                            |
| Terry                             | Segal      |                       |                  | University College London Hospitals NHS Foundation Trust       |                                          | Consortium member                                       |                                                                                            |
| Lucy                              | Wellings   |                       |                  | University College London Hospitals NHS Foundation Trust       |                                          | Consortium member                                       |                                                                                            |
| Simon                             | B Drysdale |                       |                  | St George's University Hospitals NHS Foundation Trust          |                                          | Consortium member                                       |                                                                                            |
| Nicole                            | Branch     |                       |                  | St George's University Hospitals NHS Foundation Trust          |                                          | Consortium member                                       |                                                                                            |
| Lisa                              | Hamzah     |                       |                  | St George's University Hospitals NHS Foundation Trust          |                                          | Consortium member                                       |                                                                                            |
| Heather                           | Jarman     |                       |                  | St George's University Hospitals NHS Foundation Trust          |                                          | Consortium member                                       |                                                                                            |
| Maggie                            | Nyirenda   |                       |                  | Lewisham and Greenwich NHS Trust                               |                                          | Consortium member                                       |                                                                                            |
| Lisa                              | Capozzi    |                       |                  | Lewisham and Greenwich NHS Trust                               |                                          | Consortium member                                       |                                                                                            |
| Emma                              | Gardiner   |                       |                  | Lewisham and Greenwich NHS Trust                               |                                          | Consortium member                                       |                                                                                            |
| Robert                            | Moots      |                       |                  | Liverpool University Hospitals NHS Foundation Trust            |                                          | Consortium member                                       |                                                                                            |

## Supplemental Online Content: Nonauthor Collaborators

\*First name, last name, and suffix (if applicable) are required and will appear in PubMed.

| *First Name and Middle Initial(s) | *Last Name  | *Suffix (eg, Jr, III) | Academic Degrees | Institution                                                               | Location (city, state/province, country) | Role or Contribution, eg, chair, principal investigator | Group (if more than 1 Group listed in the byline) and/or Subgroup (eg, Steering Committee) |
|-----------------------------------|-------------|-----------------------|------------------|---------------------------------------------------------------------------|------------------------------------------|---------------------------------------------------------|--------------------------------------------------------------------------------------------|
| Magda                             | Nasher      |                       |                  | Liverpool University Hospitals NHS Foundation Trust                       |                                          | Consortium member                                       |                                                                                            |
| Anita                             | Hanson      |                       |                  | Liverpool University Hospitals NHS Foundation Trust                       |                                          | Consortium member                                       |                                                                                            |
| Michelle                          | Linthorpe   |                       |                  | Liverpool University Hospitals NHS Foundation Trust                       |                                          | Consortium member                                       |                                                                                            |
| Sean                              | O'Riordan   |                       |                  | Leeds Teaching Hospitals NHS Trust                                        |                                          | Consortium member                                       |                                                                                            |
| Donna                             | Ellis       |                       |                  | Leeds Teaching Hospitals NHS Trust                                        |                                          | Consortium member                                       |                                                                                            |
| Akash                             | Deep        |                       |                  | King's College Hospital NHS Foundation Trust                              |                                          | Consortium member                                       |                                                                                            |
| Ivan                              | Caro        |                       |                  | King's College Hospital NHS Foundation Trust                              |                                          | Consortium member                                       |                                                                                            |
| Fiona                             | Shackley    |                       |                  | Sheffield Children's NHS Foundation Trust                                 |                                          | Consortium member                                       |                                                                                            |
| Arianna                           | Bellini     |                       |                  | Sheffield Children's NHS Foundation Trust                                 |                                          | Consortium member                                       |                                                                                            |
| Stuart                            | Gormley     |                       |                  | Sheffield Children's NHS Foundation Trust                                 |                                          | Consortium member                                       |                                                                                            |
| Samira                            | Neshat      |                       |                  | University Hospitals of Leicester NHS Foundation Trust                    |                                          | Consortium member                                       |                                                                                            |
| Barnaby                           | Scholefield |                       |                  | Birmingham Women's and Children's Hospital NHS Foundation Trust           |                                          | Consortium member                                       |                                                                                            |
| Ceri                              | Robbins     |                       |                  | Birmingham Women's and Children's Hospital NHS Foundation Trust           |                                          | Consortium member                                       |                                                                                            |
| Helen                             | Winmill     |                       |                  | Birmingham Women's and Children's Hospital NHS Foundation Trust           |                                          | Consortium member                                       |                                                                                            |
| Stéphane C                        | Paulus      |                       |                  | University of Oxford Partner Children's Hospital, John Radcliffe Hospital |                                          | Consortium member                                       |                                                                                            |
| Andrew J                          | Pollard     |                       |                  | University of Oxford Partner Children's                                   |                                          | Consortium member                                       |                                                                                            |
| Mark                              | Anthony     |                       |                  | University of Oxford Partner Children's Hospital, John Radcliffe Hospital |                                          | Consortium member                                       |                                                                                            |
| Sarah                             | Hopton      |                       |                  | University of Oxford Partner Children's Hospital, John Radcliffe Hospital |                                          | Consortium member                                       |                                                                                            |

## Supplemental Online Content: Nonauthor Collaborators

\*First name, last name, and suffix (if applicable) are required and will appear in PubMed.

| *First Name and Middle Initial(s) | *Last Name      | *Suffix (eg, Jr, III) | Academic Degrees | Institution                                                               | Location (city, state/province, country) | Role or Contribution, eg, chair, principal investigator | Group (if more than 1 Group listed in the byline) and/or Subgroup (eg, Steering Committee) |
|-----------------------------------|-----------------|-----------------------|------------------|---------------------------------------------------------------------------|------------------------------------------|---------------------------------------------------------|--------------------------------------------------------------------------------------------|
| Danielle                          | Miller          |                       |                  | University of Oxford Partner Children's Hospital, John Radcliffe Hospital |                                          | Consortium member                                       |                                                                                            |
| Zoe                               | Oliver          |                       |                  | University of Oxford Partner Children's Hospital, John Radcliffe Hospital |                                          | Consortium member                                       |                                                                                            |
| Sally                             | Beer            |                       |                  | University of Oxford Partner Children's Hospital, John Radcliffe Hospital |                                          | Consortium member                                       |                                                                                            |
| Bryony                            | Ward            |                       |                  | University of Oxford Partner Children's Hospital, John Radcliffe Hospital |                                          | Consortium member                                       |                                                                                            |
| Shrijana                          | Shrestha        |                       |                  | University of Oxford, Nepal Site                                          |                                          | Consortium member                                       |                                                                                            |
| Meeru                             | Gurung          |                       |                  | University of Oxford, Nepal Site                                          |                                          | Consortium member                                       |                                                                                            |
| Puja                              | Amatya          |                       |                  | University of Oxford, Nepal Site                                          |                                          | Consortium member                                       |                                                                                            |
| Bhishma                           | Pokhrel         |                       |                  | University of Oxford, Nepal Site                                          |                                          | Consortium member                                       |                                                                                            |
| Sanjeev Man                       | Bijukchhe       |                       |                  | University of Oxford, Nepal Site                                          |                                          | Consortium member                                       |                                                                                            |
| Madhav Chandra                    | Gautam          |                       |                  | University of Oxford, Nepal Site                                          |                                          | Consortium member                                       |                                                                                            |
| Sarah                             | Kelly           |                       |                  | University of Oxford, Nepal Site                                          |                                          | Consortium member                                       |                                                                                            |
| Peter                             | O'Reilly        |                       |                  | University of Oxford, Nepal Site                                          |                                          | Consortium member                                       |                                                                                            |
| Sonu                              | Shrestha        |                       |                  | University of Oxford, Nepal Site                                          |                                          | Consortium member                                       |                                                                                            |
| Federico                          | Martinón-Torres |                       |                  | Hospital Clínico Universitario de Santiago, Santiago de Compostela        |                                          | Consortium member                                       |                                                                                            |
| Antonio                           | Salas           |                       |                  | Hospital Clínico Universitario de Santiago, Santiago de Compostela        |                                          | Consortium member                                       |                                                                                            |
| Fernando Álvez                    | González        |                       |                  | Hospital Clínico Universitario de Santiago, Santiago de Compostela        |                                          | Consortium member                                       |                                                                                            |
| Sonia Ares                        | Gómez           |                       |                  | Hospital Clínico Universitario de Santiago, Santiago de Compostela        |                                          | Consortium member                                       |                                                                                            |
| Xabier                            | Bello           |                       |                  | Hospital Clínico Universitario de Santiago, Santiago de Compostela        |                                          | Consortium member                                       |                                                                                            |
| Mirian Ben                        | García          |                       |                  | Hospital Clínico Universitario de Santiago, Santiago de Compostela        |                                          | Consortium member                                       |                                                                                            |
| Fernando Caamaño                  | Viña            |                       |                  | Hospital Clínico Universitario de Santiago, Santiago de Compostela        |                                          | Consortium member                                       |                                                                                            |

## Supplemental Online Content: Nonauthor Collaborators

\*First name, last name, and suffix (if applicable) are required and will appear in PubMed.

| *First Name and Middle Initial(s) | *Last Name         | *Suffix (eg, Jr, III) | Academic Degrees | Institution                                                        | Location (city, state/province, country) | Role or Contribution, eg, chair, principal investigator | Group (if more than 1 Group listed in the byline) and/or Subgroup (eg, Steering Committee) |
|-----------------------------------|--------------------|-----------------------|------------------|--------------------------------------------------------------------|------------------------------------------|---------------------------------------------------------|--------------------------------------------------------------------------------------------|
| Sandra                            | Carnota            |                       |                  | Hospital Clínico Universitario de Santiago, Santiago de Compostela |                                          | Consortium member                                       |                                                                                            |
| María José                        | Curras-Tuala       |                       |                  | Hospital Clínico Universitario de Santiago, Santiago de Compostela |                                          | Consortium member                                       |                                                                                            |
| Ana Dacosta                       | Urbietta           |                       |                  | Hospital Clínico Universitario de Santiago, Santiago de Compostela |                                          | Consortium member                                       |                                                                                            |
| Carlos Durán                      | Suárez             |                       |                  | Hospital Clínico Universitario de Santiago, Santiago de Compostela |                                          | Consortium member                                       |                                                                                            |
| Isabel Ferreiros                  | Vidal              |                       |                  | Hospital Clínico Universitario de Santiago, Santiago de Compostela |                                          | Consortium member                                       |                                                                                            |
| Luisa García                      | Vicente            |                       |                  | Hospital Clínico Universitario de Santiago, Santiago de Compostela |                                          | Consortium member                                       |                                                                                            |
| Alberto                           | Gómez-Carballa     |                       |                  | Hospital Clínico Universitario de Santiago, Santiago de Compostela |                                          | Consortium member                                       |                                                                                            |
| Jose Gómez                        | Rial               |                       |                  | Hospital Clínico Universitario de Santiago, Santiago de Compostela |                                          | Consortium member                                       |                                                                                            |
| Pilar Leboráns                    | Iglesias           |                       |                  | Hospital Clínico Universitario de Santiago, Santiago de Compostela |                                          | Consortium member                                       |                                                                                            |
| Narmeen                           | Mallah             |                       |                  | Hospital Clínico Universitario de Santiago, Santiago de Compostela |                                          | Consortium member                                       |                                                                                            |
| Nazareth                          | Martinón-Torres    |                       |                  | Hospital Clínico Universitario de Santiago, Santiago de Compostela |                                          | Consortium member                                       |                                                                                            |
| José María                        | Martinón           |                       |                  | Hospital Clínico Universitario de Santiago, Santiago de Compostela |                                          | Consortium member                                       |                                                                                            |
| Belén Mosquera Pérez              | Sánchez            |                       |                  | Hospital Clínico Universitario de Santiago, Santiago de Compostela |                                          | Consortium member                                       |                                                                                            |
| Jacobo                            | Pardo-Seco         |                       |                  | Hospital Clínico Universitario de Santiago, Santiago de Compostela |                                          | Consortium member                                       |                                                                                            |
| Sara                              | Pischedda          |                       |                  | Hospital Clínico Universitario de Santiago, Santiago de Compostela |                                          | Consortium member                                       |                                                                                            |
| Sara Rey                          | Vázquez            |                       |                  | Hospital Clínico Universitario de Santiago, Santiago de Compostela |                                          | Consortium member                                       |                                                                                            |
| Irene Rivero                      | Calle              |                       |                  | Hospital Clínico Universitario de Santiago, Santiago de Compostela |                                          | Consortium member                                       |                                                                                            |
| Carmen                            | Rodríguez-Tenreiro |                       |                  | Hospital Clínico Universitario de Santiago, Santiago de Compostela |                                          | Consortium member                                       |                                                                                            |

## Supplemental Online Content: Nonauthor Collaborators

\*First name, last name, and suffix (if applicable) are required and will appear in PubMed.

| *First Name and Middle Initial(s) | *Last Name      | *Suffix (eg, Jr, III) | Academic Degrees | Institution                                                                                                                  | Location (city, state/province, country) | Role or Contribution, eg, chair, principal investigator | Group (if more than 1 Group listed in the byline) and/or Subgroup (eg, Steering Committee) |
|-----------------------------------|-----------------|-----------------------|------------------|------------------------------------------------------------------------------------------------------------------------------|------------------------------------------|---------------------------------------------------------|--------------------------------------------------------------------------------------------|
| Lorenzo                           | Redondo-Collazo |                       |                  | Hospital Clínico Universitario de Santiago, Santiago de Compostela                                                           |                                          | Consortium member                                       |                                                                                            |
| Antonio                           | Salas           |                       |                  | Hospital Clínico Universitario de Santiago, Santiago de Compostela                                                           |                                          | Consortium member                                       |                                                                                            |
| Sonia Serén                       | Fernández       |                       |                  | Hospital Clínico Universitario de Santiago, Santiago de Compostela                                                           |                                          | Consortium member                                       |                                                                                            |
| Marisol Vilas                     | Iglesias        |                       |                  | Hospital Clínico Universitario de Santiago, Santiago de Compostela                                                           |                                          | Consortium member                                       |                                                                                            |
| Enitan D                          | Carrol          |                       |                  | University of Liverpool Institute of Infection, Veterinary and Ecological Sciences; Alder Hey Children's Hospital, Liverpool |                                          | Consortium member                                       |                                                                                            |
| Elizabeth                         | Cocklin         |                       |                  | University of Liverpool Institute of Infection, Veterinary and Ecological Sciences; Alder Hey Children's Hospital, Liverpool |                                          | Consortium member                                       |                                                                                            |
| Rebecca                           | Beckley         |                       |                  | University of Liverpool Institute of Infection, Veterinary and Ecological Sciences; Alder Hey Children's Hospital, Liverpool |                                          | Consortium member                                       |                                                                                            |
| Abbey                             | Bracken         |                       |                  | University of Liverpool Institute of Infection, Veterinary and Ecological Sciences; Alder Hey Children's Hospital, Liverpool |                                          | Consortium member                                       |                                                                                            |
| Ceri                              | Evans           |                       |                  | University of Liverpool Institute of Infection, Veterinary and Ecological Sciences; Alder Hey Children's Hospital, Liverpool |                                          | Consortium member                                       |                                                                                            |
| Aakash                            | Khanijau        |                       |                  | University of Liverpool Institute of Infection, Veterinary and Ecological Sciences; Alder Hey Children's Hospital, Liverpool |                                          | Consortium member                                       |                                                                                            |
| Rebecca                           | Lenihan         |                       |                  | University of Liverpool Institute of Infection, Veterinary and Ecological Sciences; Alder Hey Children's Hospital, Liverpool |                                          | Consortium member                                       |                                                                                            |



## Supplemental Online Content: Nonauthor Collaborators

\*First name, last name, and suffix (if applicable) are required and will appear in PubMed.

| *First Name and Middle Initial(s) | *Last Name  | *Suffix (eg, Jr, III) | Academic Degrees | Institution                                                                                                                  | Location (city, state/province, country) | Role or Contribution, eg, chair, principal investigator | Group (if more than 1 Group listed in the byline) and/or Subgroup (eg, Steering Committee) |
|-----------------------------------|-------------|-----------------------|------------------|------------------------------------------------------------------------------------------------------------------------------|------------------------------------------|---------------------------------------------------------|--------------------------------------------------------------------------------------------|
| Nadia                             | Lewis-Burke |                       |                  | University of Liverpool Institute of Infection, Veterinary and Ecological Sciences; Alder Hey Children's Hospital, Liverpool |                                          | Consortium member                                       |                                                                                            |
| Karen                             | Newall      |                       |                  | Alder Hey Children's Hospital, Liverpool                                                                                     |                                          | Consortium member                                       |                                                                                            |
| Sam                               | Romaine     |                       |                  | Alder Hey Children's Hospital, Liverpool                                                                                     |                                          | Consortium member                                       |                                                                                            |
| Jennifer                          | Whitbread   |                       |                  | Alder Hey Children's Hospital, Liverpool                                                                                     |                                          | Consortium member                                       |                                                                                            |
| Maria                             | Tsolia      |                       |                  | National and Kapodistrian University of Athens                                                                               |                                          | Consortium member                                       |                                                                                            |
| Irini                             | Eleftheriou |                       |                  | National and Kapodistrian University of Athens                                                                               |                                          | Consortium member                                       |                                                                                            |
| Nikos                             | Spyridis    |                       |                  | National and Kapodistrian University of Athens                                                                               |                                          | Consortium member                                       |                                                                                            |
| Maria                             | Tambouratzi |                       |                  | National and Kapodistrian University of Athens                                                                               |                                          | Consortium member                                       |                                                                                            |
| Despoina                          | Maritsi     |                       |                  | National and Kapodistrian University of Athens                                                                               |                                          | Consortium member                                       |                                                                                            |
| Antonios                          | Marmarinos  |                       |                  | National and Kapodistrian University of Athens                                                                               |                                          | Consortium member                                       |                                                                                            |
| Marietta                          | Xagorari    |                       |                  | National and Kapodistrian University of Athens                                                                               |                                          | Consortium member                                       |                                                                                            |
| Lourida                           | Panagiota   |                       |                  | National and Kapodistrian University of Athens                                                                               |                                          | Consortium member                                       |                                                                                            |
| Pefanis                           | Aggelos     |                       |                  | National and Kapodistrian University of Athens                                                                               |                                          | Consortium member                                       |                                                                                            |
| Akinosoglou                       | Karolina    |                       |                  | National and Kapodistrian University of Athens                                                                               |                                          | Consortium member                                       |                                                                                            |
| Gogos                             | Charalambos |                       |                  | National and Kapodistrian University of Athens                                                                               |                                          | Consortium member                                       |                                                                                            |
| Maragos                           | Markos      |                       |                  | National and Kapodistrian University of Athens                                                                               |                                          | Consortium member                                       |                                                                                            |
| Voulgarelis                       | Michalis    |                       |                  | National and Kapodistrian University of Athens                                                                               |                                          | Consortium member                                       |                                                                                            |

## Supplemental Online Content: Nonauthor Collaborators

\*First name, last name, and suffix (if applicable) are required and will appear in PubMed.

| *First Name and Middle Initial(s) | *Last Name     | *Suffix (eg, Jr, III) | Academic Degrees | Institution                                                                      | Location (city, state/province, country) | Role or Contribution, eg, chair, principal investigator | Group (if more than 1 Group listed in the byline) and/or Subgroup (eg, Steering Committee) |
|-----------------------------------|----------------|-----------------------|------------------|----------------------------------------------------------------------------------|------------------------------------------|---------------------------------------------------------|--------------------------------------------------------------------------------------------|
| Stergiou                          | Ioanna         |                       |                  | National and Kapodistrian University of Athens                                   |                                          | Consortium member                                       |                                                                                            |
| Marieke                           | Emonts         |                       |                  | Newcastle upon Tyne Hospitals NHS Foundation Trust and Newcastle University (UK) |                                          | Consortium member                                       |                                                                                            |
| Emma                              | Lim            |                       |                  | Newcastle upon Tyne Hospitals NHS Foundation Trust and Newcastle University (UK) |                                          | Consortium member                                       |                                                                                            |
| John                              | Isaacs         |                       |                  | Newcastle upon Tyne Hospitals NHS Foundation Trust and Newcastle University (UK) |                                          | Consortium member                                       |                                                                                            |
| Kathryn                           | Bell           |                       |                  | Newcastle upon Tyne Hospitals NHS Foundation Trust and Newcastle University (UK) |                                          | Consortium member                                       |                                                                                            |
| Stephen                           | Crulley        |                       |                  | Newcastle upon Tyne Hospitals NHS Foundation Trust and Newcastle University (UK) |                                          | Consortium member                                       |                                                                                            |
| Daniel                            | Fabian         |                       |                  | Newcastle upon Tyne Hospitals NHS Foundation Trust and Newcastle University (UK) |                                          | Consortium member                                       |                                                                                            |
| Evelyn                            | Thomson        |                       |                  | Newcastle upon Tyne Hospitals NHS Foundation Trust and Newcastle University (UK) |                                          | Consortium member                                       |                                                                                            |
| Diane                             | Wallia         |                       |                  | Newcastle upon Tyne Hospitals NHS Foundation Trust and Newcastle University (UK) |                                          | Consortium member                                       |                                                                                            |
| Caroline                          | Miller         |                       |                  | Newcastle upon Tyne Hospitals NHS Foundation Trust and Newcastle University (UK) |                                          | Consortium member                                       |                                                                                            |
| Ashley                            | Bell           |                       |                  | Newcastle upon Tyne Hospitals NHS Foundation Trust and Newcastle University (UK) |                                          | Consortium member                                       |                                                                                            |
| Fabian J S                        | van der Velden |                       |                  | Newcastle upon Tyne Hospitals NHS Foundation Trust and Newcastle University (UK) |                                          | Consortium member                                       |                                                                                            |

## Supplemental Online Content: Nonauthor Collaborators

\*First name, last name, and suffix (if applicable) are required and will appear in PubMed.

| *First Name and Middle Initial(s) | *Last Name | *Suffix (eg, Jr, III) | Academic Degrees | Institution                                                                                                    | Location (city, state/province, country) | Role or Contribution, eg, chair, principal investigator | Group (if more than 1 Group listed in the byline) and/or Subgroup (eg, Steering Committee) |
|-----------------------------------|------------|-----------------------|------------------|----------------------------------------------------------------------------------------------------------------|------------------------------------------|---------------------------------------------------------|--------------------------------------------------------------------------------------------|
| Geoff                             | Shenton    |                       |                  | Newcastle upon Tyne Hospitals NHS Foundation Trust and Newcastle University (UK)                               |                                          | Consortium member                                       |                                                                                            |
| Ashley                            | Price      |                       |                  | Newcastle upon Tyne Hospitals NHS Foundation Trust and Newcastle University (UK)                               |                                          | Consortium member                                       |                                                                                            |
| Owen                              | Treloar    |                       |                  | Newcastle upon Tyne Hospitals NHS Foundation Trust and Newcastle University (UK)                               |                                          | Consortium member                                       |                                                                                            |
| Daisy                             | Thomas     |                       |                  | Newcastle upon Tyne Hospitals NHS Foundation Trust and Newcastle University (UK)                               |                                          | Consortium member                                       |                                                                                            |
| Pablo                             | Rojo       |                       |                  | Servicio Madrileño de Salud (SERMAS) - Fundación Biomédica del Hospital Universitario 12 de Octubre (FIB-H12O) |                                          | Consortium member                                       |                                                                                            |
| Cristina                          | Epalza     |                       |                  | Servicio Madrileño de Salud (SERMAS) - Fundación Biomédica del Hospital Universitario 12 de Octubre (FIB-H12O) |                                          | Consortium member                                       |                                                                                            |
| Serena                            | Villaverde |                       |                  | Servicio Madrileño de Salud (SERMAS) - Fundación Biomédica del Hospital Universitario 12 de Octubre (FIB-H12O) |                                          | Consortium member                                       |                                                                                            |
| Sonia                             | Márquez    |                       |                  | Servicio Madrileño de Salud (SERMAS) - Fundación Biomédica del Hospital Universitario 12 de Octubre (FIB-H12O) |                                          | Consortium member                                       |                                                                                            |
| Manuel                            | Gijón      |                       |                  | Servicio Madrileño de Salud (SERMAS) - Fundación Biomédica del Hospital Universitario 12 de Octubre (FIB-H12O) |                                          | Consortium member                                       |                                                                                            |
| Fátima                            | Machín     |                       |                  | Servicio Madrileño de Salud (SERMAS) - Fundación Biomédica del Hospital Universitario 12 de Octubre (FIB-H12O) |                                          | Consortium member                                       |                                                                                            |

## Supplemental Online Content: Nonauthor Collaborators

\*First name, last name, and suffix (if applicable) are required and will appear in PubMed.

| *First Name and Middle Initial(s) | *Last Name    | *Suffix (eg, Jr, III) | Academic Degrees | Institution                                                                                                    | Location (city, state/province, country) | Role or Contribution, eg, chair, principal investigator | Group (if more than 1 Group listed in the byline) and/or Subgroup (eg, Steering Committee) |
|-----------------------------------|---------------|-----------------------|------------------|----------------------------------------------------------------------------------------------------------------|------------------------------------------|---------------------------------------------------------|--------------------------------------------------------------------------------------------|
| Laura                             | Cabello       |                       |                  | Servicio Madrileño de Salud (SERMAS) - Fundación Biomédica del Hospital Universitario 12 de Octubre (FIB-H12O) |                                          | Consortium member                                       |                                                                                            |
| Irene                             | Hernández     |                       |                  | Servicio Madrileño de Salud (SERMAS) - Fundación Biomédica del Hospital Universitario 12 de Octubre (FIB-H12O) |                                          | Consortium member                                       |                                                                                            |
| Lourdes                           | Gutiérrez     |                       |                  | Servicio Madrileño de Salud (SERMAS) - Fundación Biomédica del Hospital Universitario 12 de Octubre (FIB-H12O) |                                          | Consortium member                                       |                                                                                            |
| Ángela                            | Manzanares    |                       |                  | Servicio Madrileño de Salud (SERMAS) - Fundación Biomédica del Hospital Universitario 12 de Octubre (FIB-H12O) |                                          | Consortium member                                       |                                                                                            |
| Taco W                            | Kuijpers      |                       |                  | Amsterdam University Medical Center                                                                            |                                          | Consortium member                                       |                                                                                            |
| Martijn                           | van de Kuip   |                       |                  | Amsterdam University Medical Center                                                                            |                                          | Consortium member                                       |                                                                                            |
| Marceline                         | van Furth     |                       |                  | Amsterdam University Medical Center                                                                            |                                          | Consortium member                                       |                                                                                            |
| Merlijn                           | van den Berg  |                       |                  | Amsterdam University Medical Center                                                                            |                                          | Consortium member                                       |                                                                                            |
| Giske                             | Biesbroek     |                       |                  | Amsterdam University Medical Center                                                                            |                                          | Consortium member                                       |                                                                                            |
| Floris                            | Verkuil       |                       |                  | Amsterdam University Medical Center                                                                            |                                          | Consortium member                                       |                                                                                            |
| Carlijn                           | van der Zee   |                       |                  | Amsterdam University Medical Center                                                                            |                                          | Consortium member                                       |                                                                                            |
| Dasja                             | Pajkrt        |                       |                  | Amsterdam University Medical Center                                                                            |                                          | Consortium member                                       |                                                                                            |
| Michael Boele                     | van Hensbroek |                       |                  | Amsterdam University Medical Center                                                                            |                                          | Consortium member                                       |                                                                                            |
| Dieneke                           | Schonenberg   |                       |                  | Amsterdam University Medical Center                                                                            |                                          | Consortium member                                       |                                                                                            |

## Supplemental Online Content: Nonauthor Collaborators

\*First name, last name, and suffix (if applicable) are required and will appear in PubMed.

| *First Name and Middle Initial(s) | *Last Name   | *Suffix (eg, Jr, III) | Academic Degrees | Institution                                                                                          | Location (city, state/province, country) | Role or Contribution, eg, chair, principal investigator | Group (if more than 1 Group listed in the byline) and/or Subgroup (eg, Steering Committee) |
|-----------------------------------|--------------|-----------------------|------------------|------------------------------------------------------------------------------------------------------|------------------------------------------|---------------------------------------------------------|--------------------------------------------------------------------------------------------|
| Mariken                           | Gruppen      |                       |                  | Amsterdam University Medical Center                                                                  |                                          | Consortium member                                       |                                                                                            |
| Sietse                            | Nagelkerke   |                       |                  | Amsterdam University Medical Center                                                                  |                                          | Consortium member                                       |                                                                                            |
| MachielH                          | Jansen       |                       |                  | Amsterdam University Medical Center                                                                  |                                          | Consortium member                                       |                                                                                            |
| Ines                              | Goetschalckx |                       |                  | Amsterdam University Medical Center                                                                  |                                          | Consortium member                                       |                                                                                            |
| Lorenza                           | Romani       |                       |                  | Bambino Gesù Children's Hospital, Rome                                                               |                                          | Consortium member                                       |                                                                                            |
| Maia                              | De Luca      |                       |                  | Bambino Gesù Children's Hospital, Rome                                                               |                                          | Consortium member                                       |                                                                                            |
| Sara                              | Chiurchiù    |                       |                  | Bambino Gesù Children's Hospital, Rome                                                               |                                          | Consortium member                                       |                                                                                            |
| Costanza                          | Tripiciano   |                       |                  | Bambino Gesù Children's Hospital, Rome                                                               |                                          | Consortium member                                       |                                                                                            |
| Stefania                          | Mercadante   |                       |                  | Bambino Gesù Children's Hospital, Rome                                                               |                                          | Consortium member                                       |                                                                                            |
| Clementien L                      | Vermont      |                       |                  | ERASMUS MC-Sophia Children's Hospital                                                                |                                          | Consortium member                                       |                                                                                            |
| Henriëtte A                       | Moll         |                       |                  | ERASMUS MC-Sophia Children's Hospital                                                                |                                          | Consortium member                                       |                                                                                            |
| Dorine M                          | Borensztajn  |                       |                  | ERASMUS MC-Sophia Children's Hospital                                                                |                                          | Consortium member                                       |                                                                                            |
| Nienke N                          | Hagedoorn    |                       |                  | ERASMUS MC-Sophia Children's Hospital                                                                |                                          | Consortium member                                       |                                                                                            |
| Chantal                           | Tan          |                       |                  | ERASMUS MC-Sophia Children's Hospital                                                                |                                          | Consortium member                                       |                                                                                            |
| Joany                             | Zachariasse  |                       |                  | ERASMUS MC-Sophia Children's Hospital                                                                |                                          | Consortium member                                       |                                                                                            |
| W                                 | Dik          |                       |                  | ERASMUS MC-Sophia Children's Hospital                                                                |                                          | Consortium member                                       |                                                                                            |
| Ching-Fen                         | Shen         |                       |                  | National Cheng Kung University Hospital, College of Medicine, National Cheng Kung University, Taiwan |                                          | Consortium member                                       |                                                                                            |

## Supplemental Online Content: Nonauthor Collaborators

\*First name, last name, and suffix (if applicable) are required and will appear in PubMed.

| *First Name and Middle Initial(s) | *Last Name | *Suffix (eg, Jr, III) | Academic Degrees | Institution                                                                           | Location (city, state/province, country) | Role or Contribution, eg, chair, principal investigator | Group (if more than 1 Group listed in the byline) and/or Subgroup (eg, Steering Committee) |
|-----------------------------------|------------|-----------------------|------------------|---------------------------------------------------------------------------------------|------------------------------------------|---------------------------------------------------------|--------------------------------------------------------------------------------------------|
| Dace                              | Zavadska   |                       |                  | Riga Stradins University                                                              |                                          | Consortium member                                       |                                                                                            |
| Sniedze                           | Laivacuma  |                       |                  | Riga Stradins University                                                              |                                          | Consortium member                                       |                                                                                            |
| Aleksandra                        | Rudzate    |                       |                  | Riga Stradins University                                                              |                                          | Consortium member                                       |                                                                                            |
| Diana                             | Stoldere   |                       |                  | Riga Stradins University                                                              |                                          | Consortium member                                       |                                                                                            |
| Arta                              | Barzdina   |                       |                  | Riga Stradins University                                                              |                                          | Consortium member                                       |                                                                                            |
| Elza                              | Barzdina   |                       |                  | Riga Stradins University                                                              |                                          | Consortium member                                       |                                                                                            |
| Sniedze                           | Laivacuma  |                       |                  | Riga Stradins University                                                              |                                          | Consortium member                                       |                                                                                            |
| Monta                             | Madelane   |                       |                  | Riga Stradins University                                                              |                                          | Consortium member                                       |                                                                                            |
| Dagne                             | Gravele    |                       |                  | Children clinical university hospital, Riga                                           |                                          | Consortium member                                       |                                                                                            |
| Dace                              | Svilz      |                       |                  | Children clinical university hospital, Riga                                           |                                          | Consortium member                                       |                                                                                            |
| Romain                            | Basmaci    |                       |                  | Service de Pédiatrie-Urgences, AP-HP, Hôpital Louis-Mourier, F-92700 Colombes, France |                                          | Consortium member                                       |                                                                                            |
| Noémie                            | Lachaume   |                       |                  | Service de Pédiatrie-Urgences, AP-HP, Hôpital Louis-Mourier, F-92700 Colombes, France |                                          | Consortium member                                       |                                                                                            |
| Pauline                           | Bories     |                       |                  | Service de Pédiatrie-Urgences, AP-HP, Hôpital Louis-Mourier, F-92700 Colombes, France |                                          | Consortium member                                       |                                                                                            |
| RajaBen                           | Tkhayat    |                       |                  | Service de Pédiatrie-Urgences, AP-HP, Hôpital Louis-Mourier, F-92700 Colombes, France |                                          | Consortium member                                       |                                                                                            |
| Laura                             | Chériaux   |                       |                  | Service de Pédiatrie-Urgences, AP-HP, Hôpital Louis-Mourier, F-92700 Colombes, France |                                          | Consortium member                                       |                                                                                            |
| Juraté                            | Davoust    |                       |                  | Service de Pédiatrie-Urgences, AP-HP, Hôpital Louis-Mourier, F-92700 Colombes, France |                                          | Consortium member                                       |                                                                                            |
| Kim-Thanh                         | Ong        |                       |                  | Service de Pédiatrie-Urgences, AP-HP, Hôpital Louis-Mourier, F-92700 Colombes, France |                                          | Consortium member                                       |                                                                                            |
| Marie                             | Cotillon   |                       |                  | Service de Pédiatrie-Urgences, AP-HP, Hôpital Louis-Mourier, F-92700 Colombes, France |                                          | Consortium member                                       |                                                                                            |

## Supplemental Online Content: Nonauthor Collaborators

\*First name, last name, and suffix (if applicable) are required and will appear in PubMed.

| *First Name and Middle Initial(s) | *Last Name     | *Suffix (eg, Jr, III) | Academic Degrees | Institution                                                                           | Location (city, state/province, country) | Role or Contribution, eg, chair, principal investigator | Group (if more than 1 Group listed in the byline) and/or Subgroup (eg, Steering Committee) |
|-----------------------------------|----------------|-----------------------|------------------|---------------------------------------------------------------------------------------|------------------------------------------|---------------------------------------------------------|--------------------------------------------------------------------------------------------|
| Thibault                          | de Groc        |                       |                  | Service de Pédiatrie-Urgences, AP-HP, Hôpital Louis-Mourier, F-92700 Colombes, France |                                          | Consortium member                                       |                                                                                            |
| Sébastien                         | Le             |                       |                  | Service de Pédiatrie-Urgences, AP-HP, Hôpital Louis-Mourier, F-92700 Colombes, France |                                          | Consortium member                                       |                                                                                            |
| Nathalie                          | Vergnault      |                       |                  | Service de Pédiatrie-Urgences, AP-HP, Hôpital Louis-Mourier, F-92700 Colombes, France |                                          | Consortium member                                       |                                                                                            |
| Hélène                            | Sée            |                       |                  | Service de Pédiatrie-Urgences, AP-HP, Hôpital Louis-Mourier, F-92700 Colombes, France |                                          | Consortium member                                       |                                                                                            |
| Laure                             | Cohen          |                       |                  | Service de Pédiatrie-Urgences, AP-HP, Hôpital Louis-Mourier, F-92700 Colombes, France |                                          | Consortium member                                       |                                                                                            |
| Alice                             | de Tugny       |                       |                  | Service de Pédiatrie-Urgences, AP-HP, Hôpital Louis-Mourier, F-92700 Colombes, France |                                          | Consortium member                                       |                                                                                            |
| Nevena                            | Danekova       |                       |                  | Service de Pédiatrie-Urgences, AP-HP, Hôpital Louis-Mourier, F-92700 Colombes, France |                                          | Consortium member                                       |                                                                                            |
| Marine                            | Mommert-Tripon |                       |                  | BioMérieux - Open Innovation & Partnerships Department, Lyon, Franceérieux            |                                          | Consortium member                                       |                                                                                            |
| Karen                             | Brengel-Pesce  |                       |                  | BioMérieux - Open Innovation & Partnerships Department, Lyon, Franceérieux            |                                          | Consortium member                                       |                                                                                            |
| Marko                             | Pokorn         |                       |                  | University Medical Centre Ljubljana, Slovenia                                         |                                          | Consortium member                                       |                                                                                            |
| Mojca                             | Kolnik         |                       |                  | University Medical Centre Ljubljana, Slovenia                                         |                                          | Consortium member                                       |                                                                                            |
| Tadej                             | Avčin          |                       |                  | University Medical Centre Ljubljana, Slovenia                                         |                                          | Consortium member                                       |                                                                                            |
| Tanja                             | Avramoska      |                       |                  | University Medical Centre Ljubljana, Slovenia                                         |                                          | Consortium member                                       |                                                                                            |

## Supplemental Online Content: Nonauthor Collaborators

\*First name, last name, and suffix (if applicable) are required and will appear in PubMed.

| *First Name and Middle Initial(s) | *Last Name         | *Suffix (eg, Jr, III) | Academic Degrees | Institution                                                            | Location (city, state/province, country) | Role or Contribution, eg, chair, principal investigator | Group (if more than 1 Group listed in the byline) and/or Subgroup (eg, Steering Committee) |
|-----------------------------------|--------------------|-----------------------|------------------|------------------------------------------------------------------------|------------------------------------------|---------------------------------------------------------|--------------------------------------------------------------------------------------------|
| Natalija                          | Bahovec            |                       |                  | University Medical Centre Ljubljana, Slovenia                          |                                          | Consortium member                                       |                                                                                            |
| Petra                             | Bogovič            |                       |                  | University Medical Centre Ljubljana, Slovenia                          |                                          | Consortium member                                       |                                                                                            |
| Lidija                            | Kitanovski         |                       |                  | University Medical Centre Ljubljana, Slovenia                          |                                          | Consortium member                                       |                                                                                            |
| Mirijam                           | Nahtigal           |                       |                  | University Medical Centre Ljubljana, Slovenia                          |                                          | Consortium member                                       |                                                                                            |
| Lea                               | Papst              |                       |                  | University Medical Centre Ljubljana, Slovenia                          |                                          | Consortium member                                       |                                                                                            |
| Tina                              | Plankar Srovin     |                       |                  | University Medical Centre Ljubljana, Slovenia                          |                                          | Consortium member                                       |                                                                                            |
| Franc                             | Strle              |                       |                  | University Medical Centre Ljubljana, Slovenia                          |                                          | Consortium member                                       |                                                                                            |
| Katarina                          | Vincek             |                       |                  | University Medical Centre Ljubljana, Slovenia                          |                                          | Consortium member                                       |                                                                                            |
| Michiel                           | van der Flier      |                       |                  | University Medical Center Utrecht, Utrecht                             |                                          | Consortium member                                       |                                                                                            |
| Wim J E                           | Tissing            |                       |                  | University Medical Center Utrecht, Utrecht                             |                                          | Consortium member                                       |                                                                                            |
| Roelie M                          | Wösten-van Asperen |                       |                  | University Medical Center Utrecht, Utrecht                             |                                          | Consortium member                                       |                                                                                            |
| Sebastiaan J                      | Vastert            |                       |                  | University Medical Center Utrecht, Utrecht                             |                                          | Consortium member                                       |                                                                                            |
| Daniel C                          | Vijlbrief          |                       |                  | University Medical Center Utrecht, Utrecht                             |                                          | Consortium member                                       |                                                                                            |
| Louis J                           | Bont               |                       |                  | University Medical Center Utrecht, Utrecht                             |                                          | Consortium member                                       |                                                                                            |
| Coco R                            | Beudeker           |                       |                  | University Medical Center Utrecht, Utrecht                             |                                          | Consortium member                                       |                                                                                            |
| Philipp                           | Agyeman            |                       |                  | Inselspital, Bern University Hospital, University of Bern, Switzerland |                                          | Consortium member                                       |                                                                                            |
| Luregn                            | Schlapbach         |                       |                  | Inselspital, Bern University Hospital, University of Bern, Switzerland |                                          | Consortium member                                       |                                                                                            |
| Christoph                         | Aebi               |                       |                  | Inselspital, Bern University Hospital, University of Bern, Switzerland |                                          | Consortium member                                       |                                                                                            |



## Supplemental Online Content: Nonauthor Collaborators

\*First name, last name, and suffix (if applicable) are required and will appear in PubMed.

| *First Name and Middle Initial(s) | *Last Name | *Suffix (eg, Jr, III) | Academic Degrees | Institution                                                                                                  | Location (city, state/province, country) | Role or Contribution, eg, chair, principal investigator | Group (if more than 1 Group listed in the byline) and/or Subgroup (eg, Steering Committee) |
|-----------------------------------|------------|-----------------------|------------------|--------------------------------------------------------------------------------------------------------------|------------------------------------------|---------------------------------------------------------|--------------------------------------------------------------------------------------------|
| Mariama                           | Usman      |                       |                  | Inselspital, Bern University Hospital, University of Bern, Switzerland                                       |                                          | Consortium member                                       |                                                                                            |
| Stefanie                          | Schlüchter |                       |                  | Inselspital, Bern University Hospital, University of Bern, Switzerland                                       |                                          | Consortium member                                       |                                                                                            |
| Verena                            | Wyss       |                       |                  | Inselspital, Bern University Hospital, University of Bern, Switzerland                                       |                                          | Consortium member                                       |                                                                                            |
| Nina                              | Schöbi     |                       |                  | Inselspital, Bern University Hospital, University of Bern, Switzerland                                       |                                          | Consortium member                                       |                                                                                            |
| Elisa                             | Zimmermann |                       |                  | Inselspital, Bern University Hospital, University of Bern, Switzerland                                       |                                          | Consortium member                                       |                                                                                            |
| Marion                            | Meier      |                       |                  | Inselspital, Bern University Hospital, University of Bern, Switzerland                                       |                                          | Consortium member                                       |                                                                                            |
| Kathrin                           | Weber      |                       |                  | Inselspital, Bern University Hospital, University of Bern, Switzerland                                       |                                          | Consortium member                                       |                                                                                            |
| Colin                             | Fink       |                       |                  | Micropathology Ltd, The Venture Center, University of Warwick Science Park, Sir William Lyons Road, Coventry |                                          | Consortium member                                       |                                                                                            |
| Marie                             | Voice      |                       |                  | Micropathology Ltd, The Venture Center, University of Warwick Science Park, Sir William Lyons Road, Coventry |                                          | Consortium member                                       |                                                                                            |
| Leo                               | Calvo-Bado |                       |                  | Micropathology Ltd, The Venture Center, University of Warwick Science Park, Sir William Lyons Road, Coventry |                                          | Consortium member                                       |                                                                                            |
| Michael                           | Steele     |                       |                  | Micropathology Ltd, The Venture Center, University of Warwick Science Park, Sir William Lyons Road, Coventry |                                          | Consortium member                                       |                                                                                            |
| Jennifer                          | Holden     |                       |                  | Micropathology Ltd, The Venture Center, University of Warwick Science Park, Sir William Lyons Road, Coventry |                                          | Consortium member                                       |                                                                                            |

## Supplemental Online Content: Nonauthor Collaborators

\*First name, last name, and suffix (if applicable) are required and will appear in PubMed.

| *First Name and Middle Initial(s) | *Last Name   | *Suffix (eg, Jr, III) | Academic Degrees | Institution                                                                                                  | Location (city, state/province, country) | Role or Contribution, eg, chair, principal investigator | Group (if more than 1 Group listed in the byline) and/or Subgroup (eg, Steering Committee) |
|-----------------------------------|--------------|-----------------------|------------------|--------------------------------------------------------------------------------------------------------------|------------------------------------------|---------------------------------------------------------|--------------------------------------------------------------------------------------------|
| Andrew                            | Taylor       |                       |                  | Micropathology Ltd, The Venture Center, University of Warwick Science Park, Sir William Lyons Road, Coventry |                                          | Consortium member                                       |                                                                                            |
| Ronan                             | Calvez       |                       |                  | Micropathology Ltd, The Venture Center, University of Warwick Science Park, Sir William Lyons Road, Coventry |                                          | Consortium member                                       |                                                                                            |
| Catherine                         | Davies       |                       |                  | Micropathology Ltd, The Venture Center, University of Warwick Science Park, Sir William Lyons Road, Coventry |                                          | Consortium member                                       |                                                                                            |
| Benjamin                          | Evans        |                       |                  | Micropathology Ltd, The Venture Center, University of Warwick Science Park, Sir William Lyons Road, Coventry |                                          | Consortium member                                       |                                                                                            |
| Jake                              | Stevens      |                       |                  | Micropathology Ltd, The Venture Center, University of Warwick Science Park, Sir William Lyons Road, Coventry |                                          | Consortium member                                       |                                                                                            |
| Peter                             | Matthews     |                       |                  | Micropathology Ltd, The Venture Center, University of Warwick Science Park, Sir William Lyons Road, Coventry |                                          | Consortium member                                       |                                                                                            |
| Kyle                              | Billing      |                       |                  | Micropathology Ltd, The Venture Center, University of Warwick Science Park, Sir William Lyons Road, Coventry |                                          | Consortium member                                       |                                                                                            |
| Werner                            | Zenz         |                       |                  | Medical University of Graz, Austria                                                                          |                                          | Consortium member                                       |                                                                                            |
| Alexander                         | Binder       |                       |                  | Medical University of Graz, Austria                                                                          |                                          | Consortium member                                       |                                                                                            |
| Benno                             | Kohlmaier    |                       |                  | Medical University of Graz, Austria                                                                          |                                          | Consortium member                                       |                                                                                            |
| Daniela S                         | Kohlfürst    |                       |                  | Medical University of Graz, Austria                                                                          |                                          | Consortium member                                       |                                                                                            |
| Nina A                            | Schweintzger |                       |                  | Medical University of Graz, Austria                                                                          |                                          | Consortium member                                       |                                                                                            |
| Christoph                         | Zurl         |                       |                  | Medical University of Graz, Austria                                                                          |                                          | Consortium member                                       |                                                                                            |
| Susanne                           | Hösele       |                       |                  | Medical University of Graz, Austria                                                                          |                                          | Consortium member                                       |                                                                                            |
| Manuel                            | Leitner      |                       |                  | Medical University of Graz, Austria                                                                          |                                          | Consortium member                                       |                                                                                            |

## Supplemental Online Content: Nonauthor Collaborators

\*First name, last name, and suffix (if applicable) are required and will appear in PubMed.

| *First Name and Middle Initial(s) | *Last Name         | *Suffix (eg, Jr, III) | Academic Degrees | Institution                                                                                                                                                                  | Location (city, state/province, country) | Role or Contribution, eg, chair, principal investigator | Group (if more than 1 Group listed in the byline) and/or Subgroup (eg, Steering Committee) |
|-----------------------------------|--------------------|-----------------------|------------------|------------------------------------------------------------------------------------------------------------------------------------------------------------------------------|------------------------------------------|---------------------------------------------------------|--------------------------------------------------------------------------------------------|
| Lena                              | Pölz               |                       |                  | Medical University of Graz, Austria                                                                                                                                          |                                          | Consortium member                                       |                                                                                            |
| Alexandra                         | Rusu               |                       |                  | Medical University of Graz, Austria                                                                                                                                          |                                          | Consortium member                                       |                                                                                            |
| Glorija                           | Rajic              |                       |                  | Medical University of Graz, Austria                                                                                                                                          |                                          | Consortium member                                       |                                                                                            |
| Bianca                            | Stoiser            |                       |                  | Medical University of Graz, Austria                                                                                                                                          |                                          | Consortium member                                       |                                                                                            |
| Martina                           | Strepfl            |                       |                  | Medical University of Graz, Austria                                                                                                                                          |                                          | Consortium member                                       |                                                                                            |
| Manfred G                         | Sagmeister         |                       |                  | Medical University of Graz, Austria                                                                                                                                          |                                          | Consortium member                                       |                                                                                            |
| Sebastian                         | Bauchinger         |                       |                  | Medical University of Graz, Austria                                                                                                                                          |                                          | Consortium member                                       |                                                                                            |
| Martin                            | Benesch            |                       |                  | Medical University of Graz, Austria                                                                                                                                          |                                          | Consortium member                                       |                                                                                            |
| Astrid                            | Ceolotto           |                       |                  | Medical University of Graz, Austria                                                                                                                                          |                                          | Consortium member                                       |                                                                                            |
| Ernst                             | Eber               |                       |                  | Medical University of Graz, Austria                                                                                                                                          |                                          | Consortium member                                       |                                                                                            |
| Siegfried                         | Gallistl           |                       |                  | Medical University of Graz, Austria                                                                                                                                          |                                          | Consortium member                                       |                                                                                            |
| Harald                            | Haidl              |                       |                  | Medical University of Graz, Austria                                                                                                                                          |                                          | Consortium member                                       |                                                                                            |
| Almuthe                           | Hauer              |                       |                  | Medical University of Graz, Austria                                                                                                                                          |                                          | Consortium member                                       |                                                                                            |
| Christa                           | Hude               |                       |                  | Medical University of Graz, Austria                                                                                                                                          |                                          | Consortium member                                       |                                                                                            |
| Andreas                           | Kapper             |                       |                  | Medical University of Graz, Austria                                                                                                                                          |                                          | Consortium member                                       |                                                                                            |
| Markus                            | Keldorfer          |                       |                  | Medical University of Graz, Austria                                                                                                                                          |                                          | Consortium member                                       |                                                                                            |
| Sabine                            | Löffler            |                       |                  | Medical University of Graz, Austria                                                                                                                                          |                                          | Consortium member                                       |                                                                                            |
| Tobias                            | Niedrist           |                       |                  | Medical University of Graz, Austria                                                                                                                                          |                                          | Consortium member                                       |                                                                                            |
| Heidemarie                        | Pilch              |                       |                  | Medical University of Graz, Austria                                                                                                                                          |                                          | Consortium member                                       |                                                                                            |
| Andreas                           | Pfleger            |                       |                  | Medical University of Graz, Austria                                                                                                                                          |                                          | Consortium member                                       |                                                                                            |
| Klaus                             | Pfurtscheller      |                       |                  | Medical University of Graz, Austria                                                                                                                                          |                                          | Consortium member                                       |                                                                                            |
| Siegfried                         | Rödl               |                       |                  | Medical University of Graz, Austria                                                                                                                                          |                                          | Consortium member                                       |                                                                                            |
| Andrea                            | Skrabl-Baumgartner |                       |                  | Medical University of Graz, Austria                                                                                                                                          |                                          | Consortium member                                       |                                                                                            |
| Volker                            | Strenger           |                       |                  | Medical University of Graz, Austria                                                                                                                                          |                                          | Consortium member                                       |                                                                                            |
| Elmar                             | Wallner            |                       |                  | Medical University of Graz, Austria                                                                                                                                          |                                          | Consortium member                                       |                                                                                            |
| Maike K                           | Tauchert           |                       |                  | Biobanking and BioMolecular Resources Research Infrastructure - European Research Infrastructure Consortium (BBMRI-ERIC), Neue Stiftingtalstrasse 2/B/6, 8010, Graz, Austria |                                          | Consortium member                                       |                                                                                            |
| Shunmay                           | Yeung              |                       |                  | London School of Hygiene and Tropical Medicine                                                                                                                               |                                          | Consortium member                                       |                                                                                            |
| Manuel                            | Dewez              |                       |                  | London School of Hygiene and Tropical Medicine                                                                                                                               |                                          | Consortium member                                       |                                                                                            |

## Supplemental Online Content: Nonauthor Collaborators

\*First name, last name, and suffix (if applicable) are required and will appear in PubMed.

| *First Name and Middle Initial(s) | *Last Name     | *Suffix (eg, Jr, III) | Academic Degrees | Institution                                                         | Location (city, state/province, country) | Role or Contribution, eg, chair, principal investigator | Group (if more than 1 Group listed in the byline) and/or Subgroup (eg, Steering Committee) |
|-----------------------------------|----------------|-----------------------|------------------|---------------------------------------------------------------------|------------------------------------------|---------------------------------------------------------|--------------------------------------------------------------------------------------------|
| David                             | Bath           |                       |                  | London School of Hygiene and Tropical Medicine                      |                                          | Consortium member                                       |                                                                                            |
| Elizabeth                         | Fitchett       |                       |                  | London School of Hygiene and Tropical Medicine                      |                                          | Consortium member                                       |                                                                                            |
| Fiona                             | Cresswell      |                       |                  | London School of Hygiene and Tropical Medicine                      |                                          | Consortium member                                       |                                                                                            |
| Effua                             | Usuf           |                       |                  | Medical Research Council Unit The Gambia at LSHTM                   |                                          | Consortium member                                       |                                                                                            |
| Kalifa                            | Bojang         |                       |                  | Medical Research Council Unit The Gambia at LSHTM                   |                                          | Consortium member                                       |                                                                                            |
| Anna                              | Roca           |                       |                  | Medical Research Council Unit The Gambia at LSHTM                   |                                          | Consortium member                                       |                                                                                            |
| Isatou                            | Sarr           |                       |                  | Medical Research Council Unit The Gambia at LSHTM                   |                                          | Consortium member                                       |                                                                                            |
| Momodou                           | Saidykhan      |                       |                  | Medical Research Council Unit The Gambia at LSHTM                   |                                          | Consortium member                                       |                                                                                            |
| Ebrahim                           | Ndure          |                       |                  | Medical Research Council Unit The Gambia at LSHTM                   |                                          | Consortium member                                       |                                                                                            |
| Ulrich                            | von Both       |                       |                  | Dr. von Hauner Children's Hospital, University Hospital, LMU Munich |                                          | Consortium member                                       |                                                                                            |
| Laura                             | Kolberg        |                       |                  | Dr. von Hauner Children's Hospital, University Hospital, LMU Munich |                                          | Consortium member                                       |                                                                                            |
| Patricia                          | Schmied        |                       |                  | Dr. von Hauner Children's Hospital, University Hospital, LMU Munich |                                          | Consortium member                                       |                                                                                            |
| Ioanna                            | Mavridi        |                       |                  | Dr. von Hauner Children's Hospital, University Hospital, LMU Munich |                                          | Consortium member                                       |                                                                                            |
| Irene                             | Alba-Alejandre |                       |                  | University Hospital, LMU Munich, Munich, Germany                    |                                          | Consortium member                                       |                                                                                            |
| Nikolaus                          | Haas           |                       |                  | University Hospital, LMU Munich,                                    |                                          | Consortium member                                       |                                                                                            |
| Esther                            | Maier          |                       |                  | Dr. von Hauner Children's Hospital, University Hospital, LMU Munich |                                          | Consortium member                                       |                                                                                            |
| Sabrina                           | Juranek        |                       |                  | Dr. von Hauner Children's Hospital, University Hospital, LMU Munich |                                          | Consortium member                                       |                                                                                            |
| Tobias                            | Feuchtinger    |                       |                  | Dr. von Hauner Children's Hospital, University Hospital, LMU Munich |                                          | Consortium member                                       |                                                                                            |

## Supplemental Online Content: Nonauthor Collaborators

\*First name, last name, and suffix (if applicable) are required and will appear in PubMed.

| *First Name and Middle Initial(s) | *Last Name          | *Suffix (eg, Jr, III) | Academic Degrees | Institution                                                                | Location (city, state/province, country) | Role or Contribution, eg, chair, principal investigator | Group (if more than 1 Group listed in the byline) and/or Subgroup (eg, Steering Committee) |
|-----------------------------------|---------------------|-----------------------|------------------|----------------------------------------------------------------------------|------------------------------------------|---------------------------------------------------------|--------------------------------------------------------------------------------------------|
| Katharina                         | Danhauser           |                       |                  | Dr. von Hauner Children's Hospital, University Hospital, LMU Munich        |                                          | Consortium member                                       |                                                                                            |
| Matthias                          | Griese              |                       |                  | Dr. von Hauner Children's Hospital, University Hospital, LMU Munich        |                                          | Consortium member                                       |                                                                                            |
| Matthias                          | Kappler             |                       |                  | Dr. von Hauner Children's Hospital, University Hospital, LMU Munich        |                                          | Consortium member                                       |                                                                                            |
| Eberhard                          | Lurz                |                       |                  | Dr. von Hauner Children's Hospital, University Hospital, LMU Munich        |                                          | Consortium member                                       |                                                                                            |
| Sebastian                         | Schroepf            |                       |                  | Dr. von Hauner Children's Hospital, University Hospital, LMU Munich        |                                          | Consortium member                                       |                                                                                            |
| Florian                           | Hoffmann            |                       |                  | Dr. von Hauner Children's Hospital, University Hospital, LMU Munich        |                                          | Consortium member                                       |                                                                                            |
| Karl                              | Reiter              |                       |                  | Dr. von Hauner Children's Hospital, University Hospital, LMU Munich        |                                          | Consortium member                                       |                                                                                            |
| Carola                            | Schoen              |                       |                  | Dr. von Hauner Children's Hospital, University Hospital, LMU Munich        |                                          | Consortium member                                       |                                                                                            |
| Philipp                           | Agyeman             |                       |                  | Bern University Hospital, University of Bern, Switzerland                  |                                          | Consortium member                                       |                                                                                            |
| Christoph                         | Aebi                |                       |                  | Bern University Hospital, University of Bern, Switzerland                  |                                          | Consortium member                                       |                                                                                            |
| Luregn J                          | Schlapbach          |                       |                  | University Children's Hospital Zurich                                      |                                          | Consortium member                                       |                                                                                            |
| Eric                              | Giannoni            |                       |                  | Lausanne University Hospital and University of Lausanne, Switzerland       |                                          | Consortium member                                       |                                                                                            |
| Martin                            | Stocker             |                       |                  | Children's Hospital Lucerne, Switzerland                                   |                                          | Consortium member                                       |                                                                                            |
| Klara M                           | Posfay-Barbe        |                       |                  | Children's Hospital of Geneva, University Hospitals of Geneva, Switzerland |                                          | Consortium member                                       |                                                                                            |
| Ulrich                            | Heininger           |                       |                  | University of Basel Children's Hospital, Switzerland                       |                                          | Consortium member                                       |                                                                                            |
| Sara                              | Bernhard-Stirnemann |                       |                  | Children's Hospital Aarau, Switzerland                                     |                                          | Consortium member                                       |                                                                                            |
| Anita                             | Niederer-Loher      |                       |                  | Children's Hospital of Eastern Switzerland St. Gallen, Switzerland         |                                          | Consortium member                                       |                                                                                            |
| Christian                         | Kahlert             |                       |                  | Children's Hospital of Eastern Switzerland St. Gallen, Switzerland         |                                          | Consortium member                                       |                                                                                            |

## Supplemental Online Content: Nonauthor Collaborators

\*First name, last name, and suffix (if applicable) are required and will appear in PubMed.

| <b>*First Name and Middle Initial(s)</b> | <b>*Last Name</b> | <b>*Suffix (eg, Jr, III)</b> | Academic Degrees | Institution                                                                    | Location (city, state/province, country) | Role or Contribution, eg, chair, principal investigator | Group (if more than 1 Group listed in the byline) and/or Subgroup (eg, Steering Committee) |
|------------------------------------------|-------------------|------------------------------|------------------|--------------------------------------------------------------------------------|------------------------------------------|---------------------------------------------------------|--------------------------------------------------------------------------------------------|
| Giancarlo                                | Natalucci         |                              |                  | University Hospital Zurich, Switzerland                                        |                                          | Consortium member                                       |                                                                                            |
| Christa                                  | Relly             |                              |                  | Children's Research Center, University Children's Hospital Zurich, Switzerland |                                          | Consortium member                                       |                                                                                            |
| Christoph                                | Berger            |                              |                  | Children's Research Center, University Children's Hospital Zurich, Switzerland |                                          | Consortium member                                       |                                                                                            |
| Thomas                                   | Riedel            |                              |                  | Children's Hospital Chur, Switzerland                                          |                                          | Consortium member                                       |                                                                                            |
