# Supplementary material for: Evaluation of Autoantibody Binding to Cardiac Tissue in Multisystem Inflammatory Syndrome in Children and COVID-19 Vaccination–Induced Myocarditis
Source: PubMed Central journal article supplement (PMC10196878; doi:10.1001/jamanetworkopen.2023.14291), 2023-05-18
Supplement: jamanetwopen-e2314291-s003.pdf [file jamanetwopen-e2314291-s003.pdf]

## Data Sharing Statement

Patel. Evaluation of Autoantibody Binding to Cardiac Tissue in Multisystem Inflammatory Syndrome in Children and COVID-19 Vaccination–Induced Myocarditis. *JAMA Netw Open*. Published May 18, 2023. doi:10.1001/jamanetworkopen.2023.14291

### Data

**Data available:** Yes

**Data types:** Deidentified participant data

**How to access data:** [harsita.patel08@imperial.ac.uk](mailto:harsita.patel08@imperial.ac.uk)

**When available:** With publication

### Supporting Documents

**Document types:** None

### Additional Information

**Who can access the data:** researchers whose proposed use of the data has been approved

**Types of analyses:** for a specified purpose

**Mechanisms of data availability:** with a signed data access agreement
